# Supplementary material
Source: PubMed Central journal article supplement (PMC3606667)

## *Supporting Information*

### **Bioactive Flavaglines and Other Constituents Isolated from *Aglaia perviridis*<sup>#</sup>**

Li Pan,<sup>†</sup> Ulyana Muñoz Acuña,<sup>‡</sup> Jie Li,<sup>†</sup> Nivedita Jena,<sup>†</sup> Tran Ngoc Ninh,<sup>§</sup> Caroline M. Pannell,<sup>⊥</sup> Heebyung Chai,<sup>†</sup> James R. Fuchs,<sup>†</sup> Esperanza J. Carcache de Blanco,<sup>†,‡</sup> Djaja D. Soejarto,<sup>||,∇</sup> and A. Douglas Kinghorn<sup>\*,†</sup>

<sup>†</sup> Division of Medicinal Chemistry and Pharmacognosy, College of Pharmacy, The Ohio State University, Columbus, Ohio 43210, United States

<sup>‡</sup> Division of Pharmacy Practice and Administration, College of Pharmacy, The Ohio State University, Columbus, Ohio 43210, United States

<sup>§</sup> Institute of Ecology and Biological Resources, Vietnamese Academy of Science and Technology, Hoang Quoc Viet, Cau Giay, Hanoi, Vietnam

<sup>⊥</sup> Department of Plant Sciences, University of Oxford, South Parks Road, Oxford OX1 3RB, U. K.

<sup>||</sup> Program for Collaborative Research in the Pharmaceutical Science and Department of Medicinal Chemistry and Pharmacognosy, College of Pharmacy, University of Illinois at Chicago, Chicago, Illinois 60612, United States

<sup>∇</sup> Department of Botany, Field Museum of Natural History, 1400 S. Lake Shore Drive, Chicago, Illinois 60605, United States

<sup>#</sup> Dedicated for Dr. Lester A. Mitscher, of the University of Kansas, for his pioneering

work on the discovery of bioactive natural products and their derivatives

### Supporting information list.

- Figure S1-1.**  $^1\text{H}$  NMR spectrum of compound **1** ( $\text{CDCl}_3$ , 400 MHz).  
**Figure S1-2.**  $^{13}\text{C}$  DEPT 135 spectrum of compound **1** ( $\text{CDCl}_3$ , 100 MHz).  
**Figure S1-3.**  $^{13}\text{C}$  NMR spectrum of compound **1** ( $\text{CDCl}_3$ , 100 MHz).  
**Figure S1-4.** HSQC spectrum of compound **1** ( $\text{CDCl}_3$ , 400 MHz).  
**Figure S1-5.** HMBC spectrum of compound **1** ( $\text{CDCl}_3$ , 400 MHz).  
**Figure S1-6.**  $^1\text{H}$ - $^1\text{H}$  COSY spectrum of compound **1** ( $\text{CDCl}_3$ , 400 MHz).  
**Figure S1-7.** NOESY spectrum of compound **1** ( $\text{CDCl}_3$ , 400 MHz).  
**Figure S2-1.**  $^1\text{H}$  NMR spectrum of compound **2** ( $\text{CDCl}_3$ , 400 MHz).  
**Figure S2-2.**  $^{13}\text{C}$  DEPT 135 spectrum of compound **2** ( $\text{CDCl}_3$ , 100 MHz).  
**Figure S2-3.**  $^{13}\text{C}$  NMR spectrum of compound **2** ( $\text{CDCl}_3$ , 100 MHz).  
**Figure S2-4.** HSQC spectrum of compound **2** ( $\text{CDCl}_3$ , 400 MHz).  
**Figure S2-5.** HMBC spectrum of compound **2** ( $\text{CDCl}_3$ , 400 MHz).  
**Figure S2-6.**  $^1\text{H}$ - $^1\text{H}$  COSY spectrum of compound **2** ( $\text{CDCl}_3$ , 400 MHz).  
**Figure S2-7.** NOESY spectrum of compound **2** ( $\text{CDCl}_3$ , 400 MHz).  
**Figure S3-1.**  $^1\text{H}$  NMR spectrum of compound **3** ( $\text{CDCl}_3$ , 400 MHz).  
**Figure S3-2.**  $^{13}\text{C}$  DEPT 135 spectrum of compound **3** ( $\text{CDCl}_3$ , 100 MHz).  
**Figure S3-3.**  $^{13}\text{C}$  NMR spectrum of compound **3** ( $\text{CDCl}_3$ , 100 MHz).  
**Figure S3-4.** HSQC spectrum of compound **3** ( $\text{CDCl}_3$ , 400 MHz).  
**Figure S3-5.** HMBC spectrum of compound **3** ( $\text{CDCl}_3$ , 400 MHz).  
**Figure S3-6.**  $^1\text{H}$ - $^1\text{H}$  COSY spectrum of compound **3** ( $\text{CDCl}_3$ , 400 MHz).  
**Figure S3-7.** NOESY spectrum of compound **3** ( $\text{CDCl}_3$ , 400 MHz).  
**Figure S4-1.**  $^1\text{H}$  NMR spectrum of compound **4** ( $\text{CDCl}_3$ , 400 MHz).  
**Figure S4-2.**  $^{13}\text{C}$  DEPT 135 spectrum of compound **4** ( $\text{CDCl}_3$ , 100 MHz).  
**Figure S4-3.**  $^{13}\text{C}$  NMR spectrum of compound **4** ( $\text{CDCl}_3$ , 100 MHz).  
**Figure S4-4.** HSQC spectrum of compound **4** ( $\text{CDCl}_3$ , 400 MHz).  
**Figure S4-5.** HMBC spectrum of compound **4** ( $\text{CDCl}_3$ , 400 MHz).  
**Figure S4-6.**  $^1\text{H}$ - $^1\text{H}$  COSY spectrum of compound **4** ( $\text{CDCl}_3$ , 400 MHz).  
**Figure S4-7.** NOESY spectrum of compound **4** ( $\text{CDCl}_3$ , 400 MHz).  
**Figure S5-1.**  $^1\text{H}$  NMR spectrum of compound **5** ( $\text{CDCl}_3$ , 400 MHz).  
**Figure S5-2.**  $^{13}\text{C}$  DEPT 135 spectrum of compound **5** ( $\text{CDCl}_3$ , 100 MHz).  
**Figure S5-3.**  $^{13}\text{C}$  NMR spectrum of compound **5** ( $\text{CDCl}_3$ , 100 MHz).  
**Figure S5-4.** HSQC spectrum of compound **5** ( $\text{CDCl}_3$ , 400 MHz).  
**Figure S5-5.** HMBC spectrum of compound **5** ( $\text{CDCl}_3$ , 400 MHz).  
**Figure S5-6.** NOESY spectrum of compound **5** ( $\text{CDCl}_3$ , 400 MHz).  
**Figure S5-7.**  $^1\text{H}$  NMR spectrum of (*R*)-MTPA ester of compound **5** (pyridine-*d*<sub>5</sub>, 400 MHz).  
**Figure S5-8.**  $^1\text{H}$  NMR spectrum of (*S*)-MTPA ester of compound **5** (pyridine-*d*<sub>5</sub>, 400 MHz).

MHz).

**Figure S6-1.**  $^1\text{H}$  NMR spectrum of compound **6** ( $\text{CDCl}_3$ , 400 MHz).

**Figure S6-2.**  $^{13}\text{C}$  DEPT 135 spectrum of compound **6** ( $\text{CDCl}_3$ , 100 MHz).

**Figure S6-3.**  $^{13}\text{C}$  NMR spectrum of compound **6** ( $\text{CDCl}_3$ , 100 MHz).

**Figure S6-4.** HSQC spectrum of compound **6** ( $\text{CDCl}_3$ , 400 MHz).

**Figure S6-5.** HMBC spectrum of compound **6** ( $\text{CDCl}_3$ , 400 MHz).

**Figure S6-6.**  $^1\text{H}$ - $^1\text{H}$  COSY spectrum of compound **6** ( $\text{CDCl}_3$ , 400 MHz).

**Figure S6-7.** NOESY spectrum of compound **6** ( $\text{CDCl}_3$ , 400 MHz).

**Figure S6-8.**  $^1\text{H}$  NMR spectrum of (*R*)-MTPA ester of compound **6** (pyridine- $d_5$ , 400 MHz).

**Figure S6-9.**  $^1\text{H}$  NMR spectrum of (*S*)-MTPA ester of compound **6** (pyridine- $d_5$ , 400 MHz).

**Figure S7-1.**  $^1\text{H}$  NMR spectrum of compound **7** ( $\text{CDCl}_3$ , 400 MHz).

**Figure S7-2.**  $^{13}\text{C}$  DEPT 135 spectrum of compound **7** ( $\text{CDCl}_3$ , 100 MHz).

**Figure S7-3.**  $^{13}\text{C}$  NMR spectrum of compound **7** ( $\text{CDCl}_3$ , 100 MHz).

**Figure S7-4.** HSQC spectrum of compound **7** ( $\text{CDCl}_3$ , 400 MHz).

**Figure S7-5.** HMBC spectrum of compound **7** ( $\text{CDCl}_3$ , 400 MHz).

**Figure S7-6.**  $^1\text{H}$ - $^1\text{H}$  COSY spectrum of compound **7** ( $\text{CDCl}_3$ , 400 MHz).

**Figure S7-7.** NOESY spectrum of compound **7** ( $\text{CDCl}_3$ , 400 MHz).

**Figure S7-8.**  $^1\text{H}$  NMR spectrum of (*R*)-MTPA ester of compound **7** (pyridine- $d_5$ , 400 MHz).

**Figure S7-9.**  $^1\text{H}$  NMR spectrum of (*S*)-MTPA ester of compound **7** (pyridine- $d_5$ , 400 MHz).

**Figure S8-1.**  $^1\text{H}$  NMR spectrum of compound **8** (methanol- $d_4$ , 400 MHz).

**Figure S8-2.**  $^{13}\text{C}$  DEPT 135 spectrum of compound **8** (methanol- $d_4$ , 100 MHz).

**Figure S8-3.**  $^{13}\text{C}$  NMR spectrum of compound **8** (methanol- $d_4$ , 100 MHz).

**Figure S8-4.** HSQC spectrum of compound **8** (methanol- $d_4$ , 400 MHz).

**Figure S8-5.** HMBC spectrum of compound **8** (methanol- $d_4$ , 400 MHz).

**Figure S8-6.**  $^1\text{H}$ - $^1\text{H}$  COSY spectrum of compound **8** (methanol- $d_4$ , 400 MHz).

**Figure S8-7.** NOESY spectrum of compound **8** (methanol- $d_4$ , 400 MHz).

**Figure S1-1.**  $^1\text{H}$  NMR spectrum of compound **1** ( $\text{CDCl}_3$ , 400 MHz).

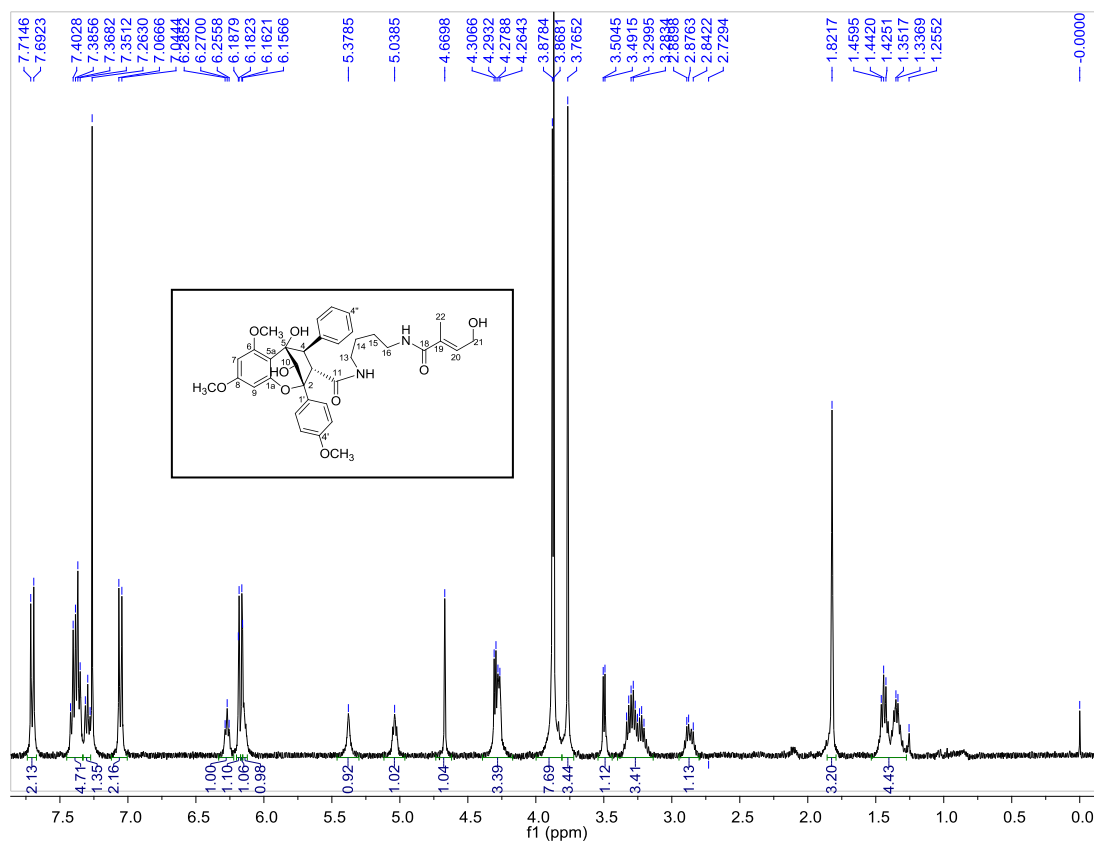

**Figure S1-2.**  $^{13}\text{C}$  DEPT135 spectrum of compound **1** ( $\text{CDCl}_3$ , 100 MHz).

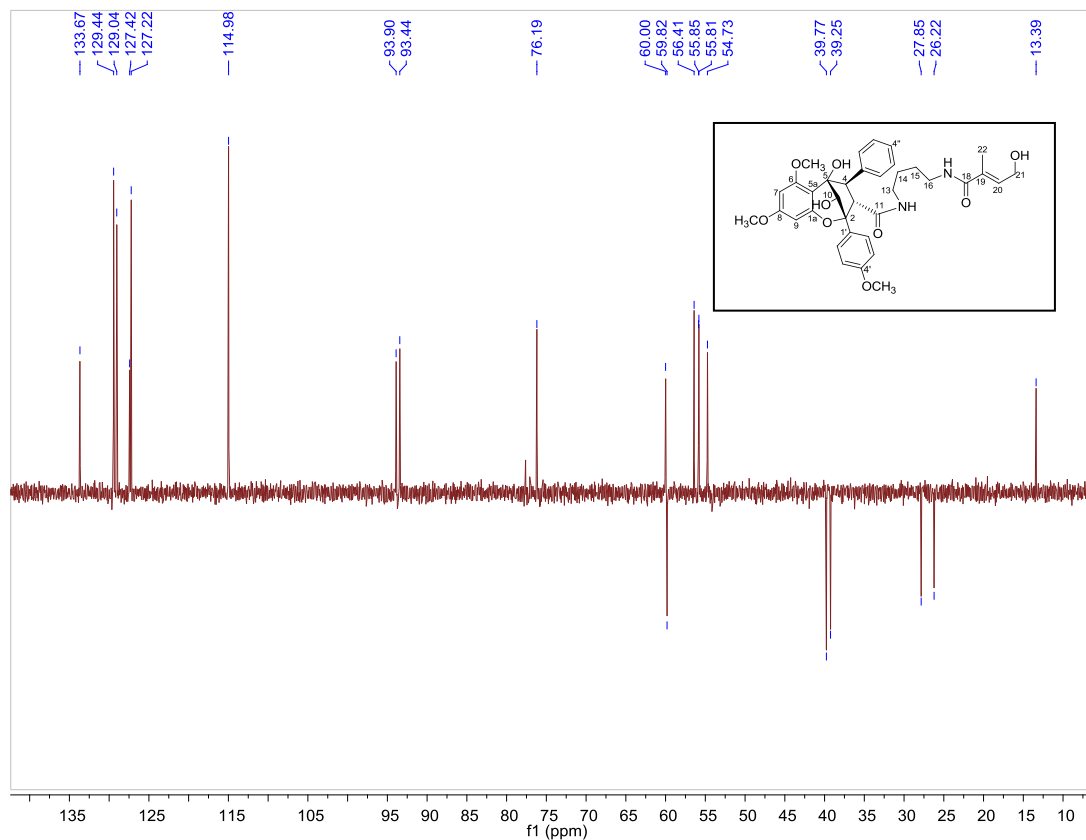

**Figure S1-3.**  $^{13}\text{C}$  NMR spectrum of compound **1** ( $\text{CDCl}_3$ , 100 MHz).

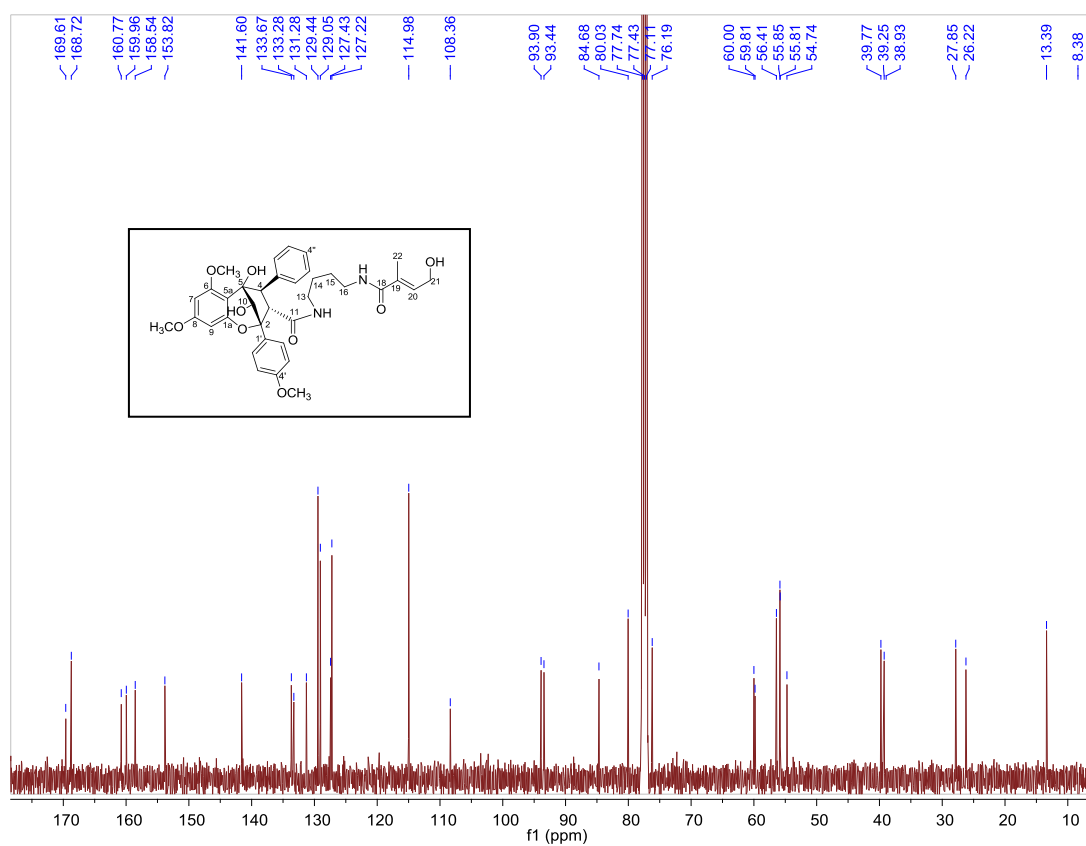

**Figure S1-4.** HSQC spectrum of compound **1** ( $\text{CDCl}_3$ , 400, 100 MHz).

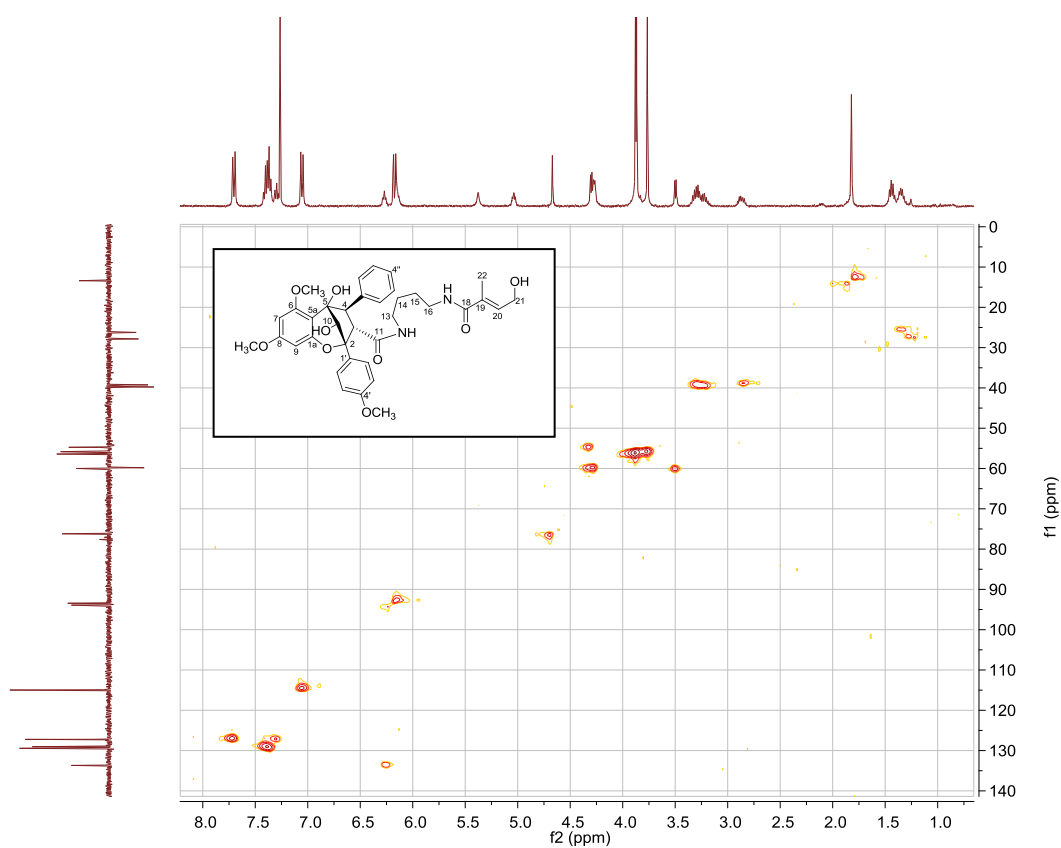

Figure S1-5. HMBC spectrum of compound **1** (CDCl<sub>3</sub>, 400, 100 MHz).

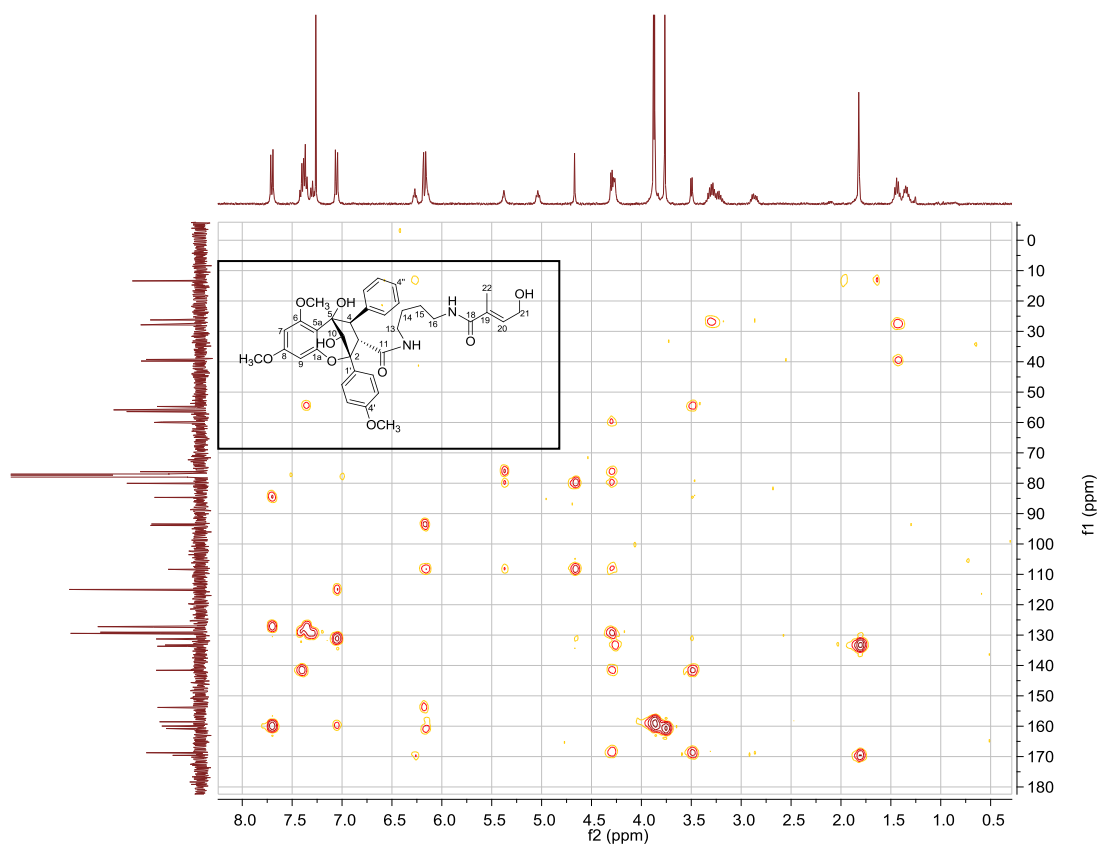

Figure S1-6. <sup>1</sup>H-<sup>1</sup>H COSY spectrum of compound **1** (CDCl<sub>3</sub>, 400 MHz).

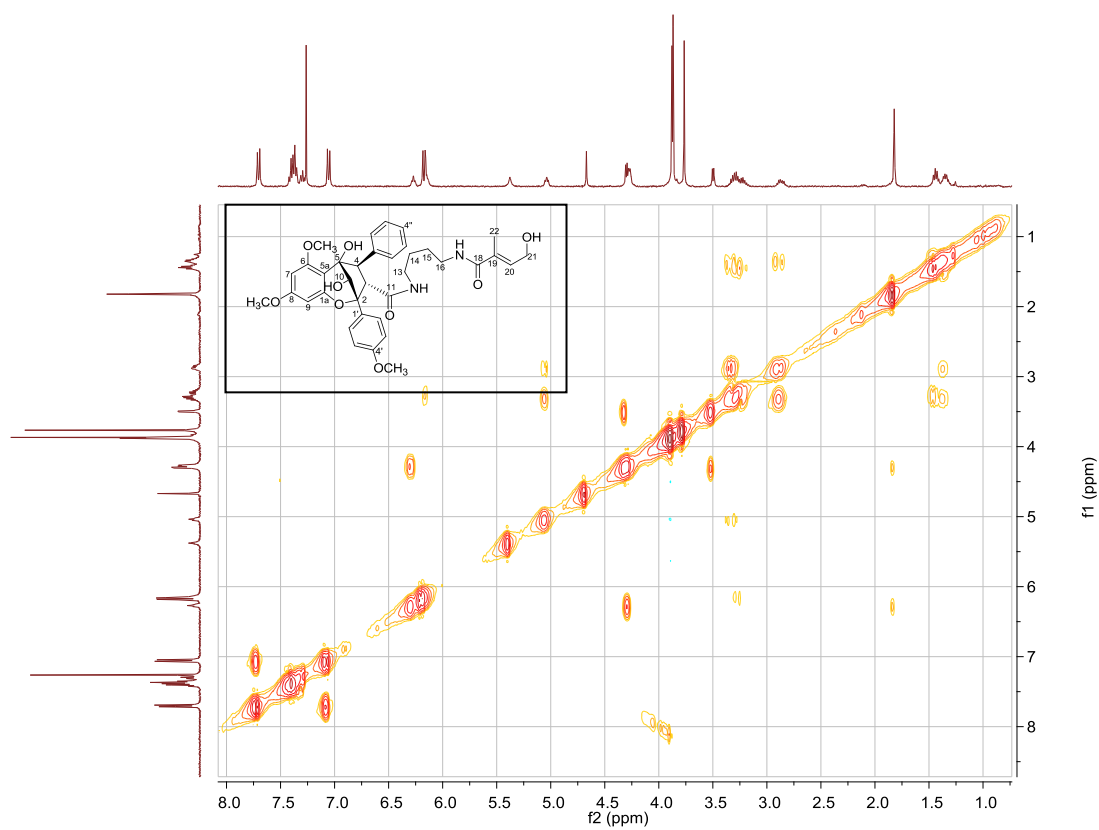

Figure S1-7. NOESY spectrum of compound 1 (CDCl<sub>3</sub>, 400 MHz).

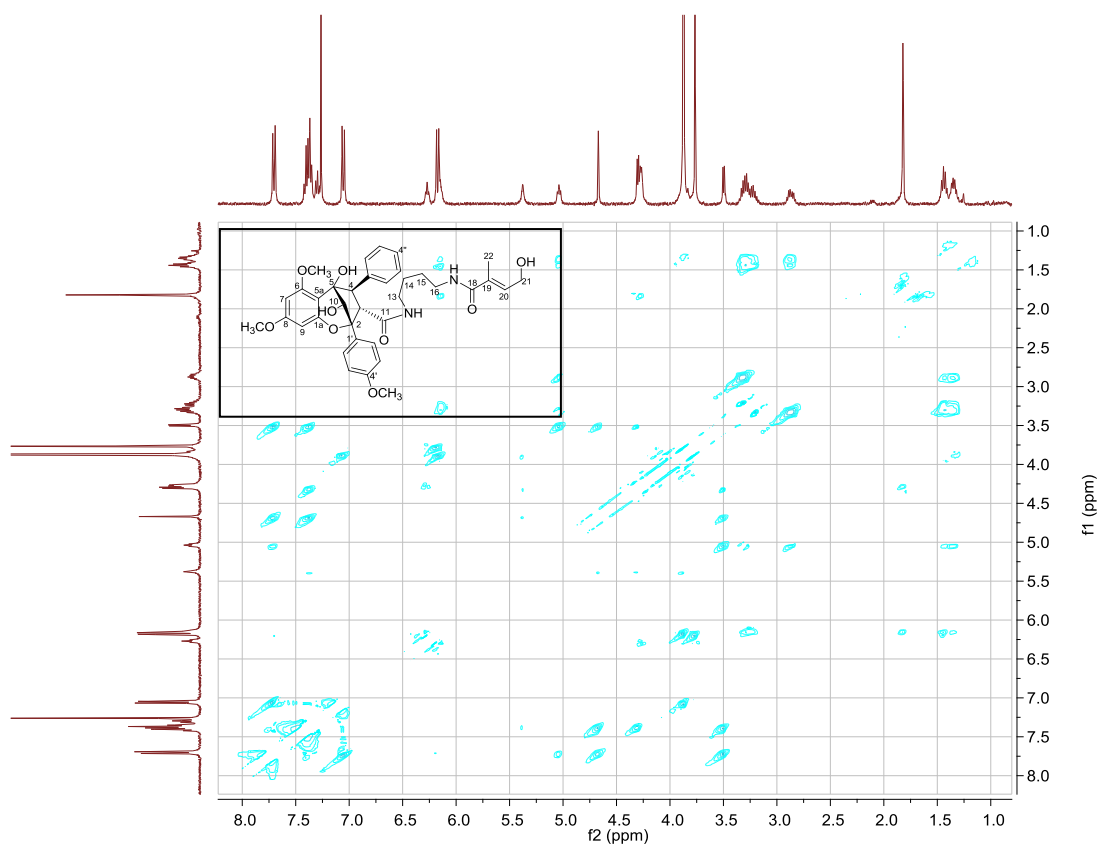

Figure S2-1. <sup>1</sup>H NMR spectrum of compound 2 (CDCl<sub>3</sub>, 400 MHz).

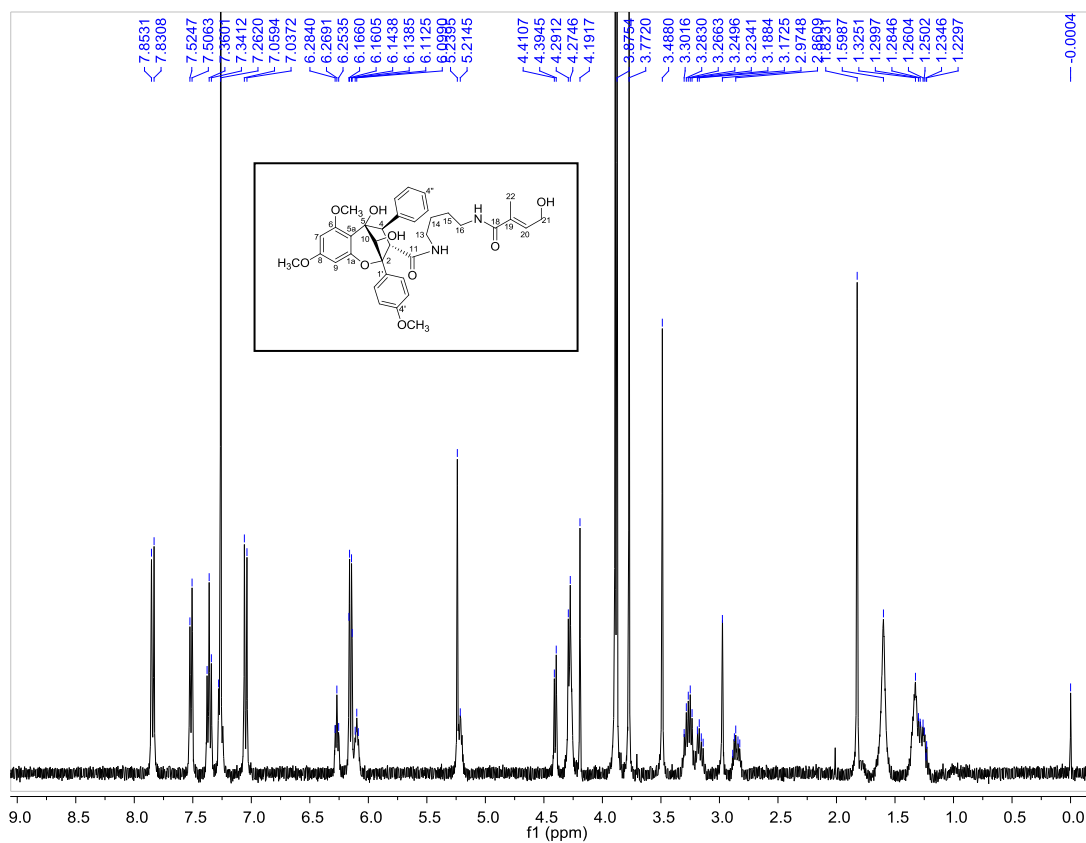

**Figure S2-2.**  $^{13}\text{C}$  DEPT135 spectrum of compound **2** ( $\text{CDCl}_3$ , 100 MHz).

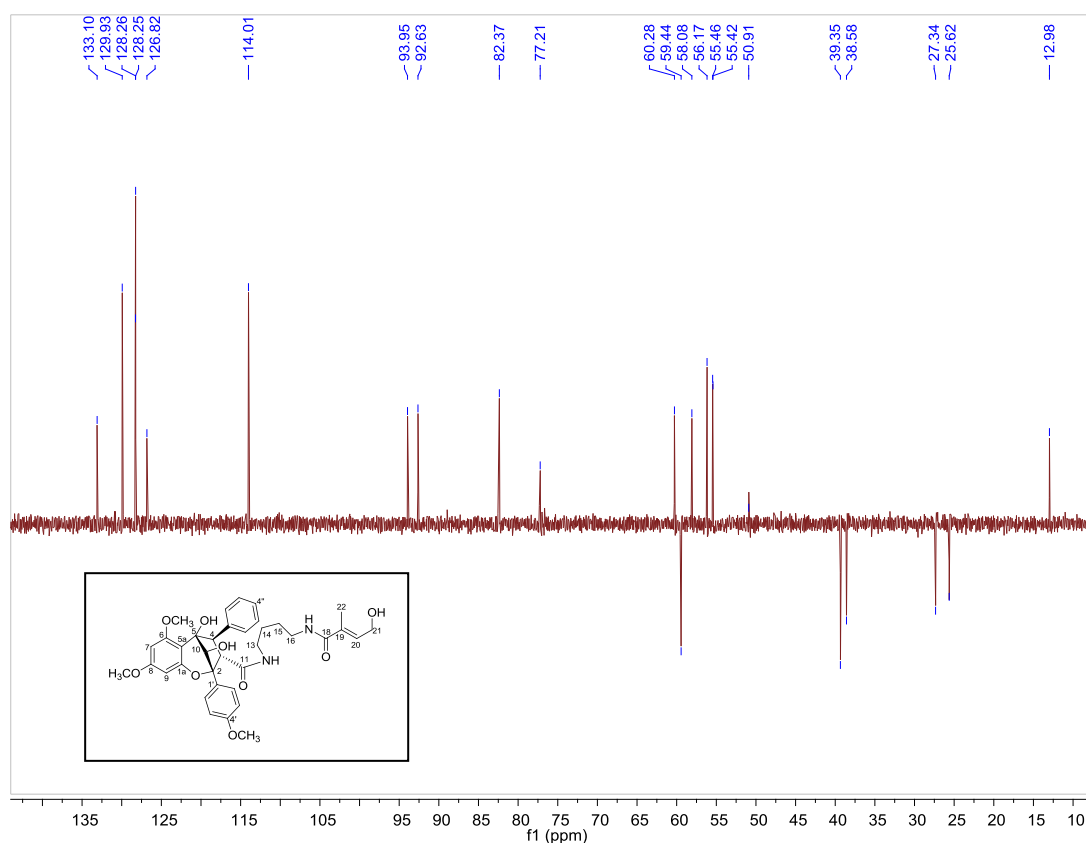

**Figure S2-3.**  $^{13}\text{C}$  NMR spectrum of compound **2** ( $\text{CDCl}_3$ , 100 MHz).

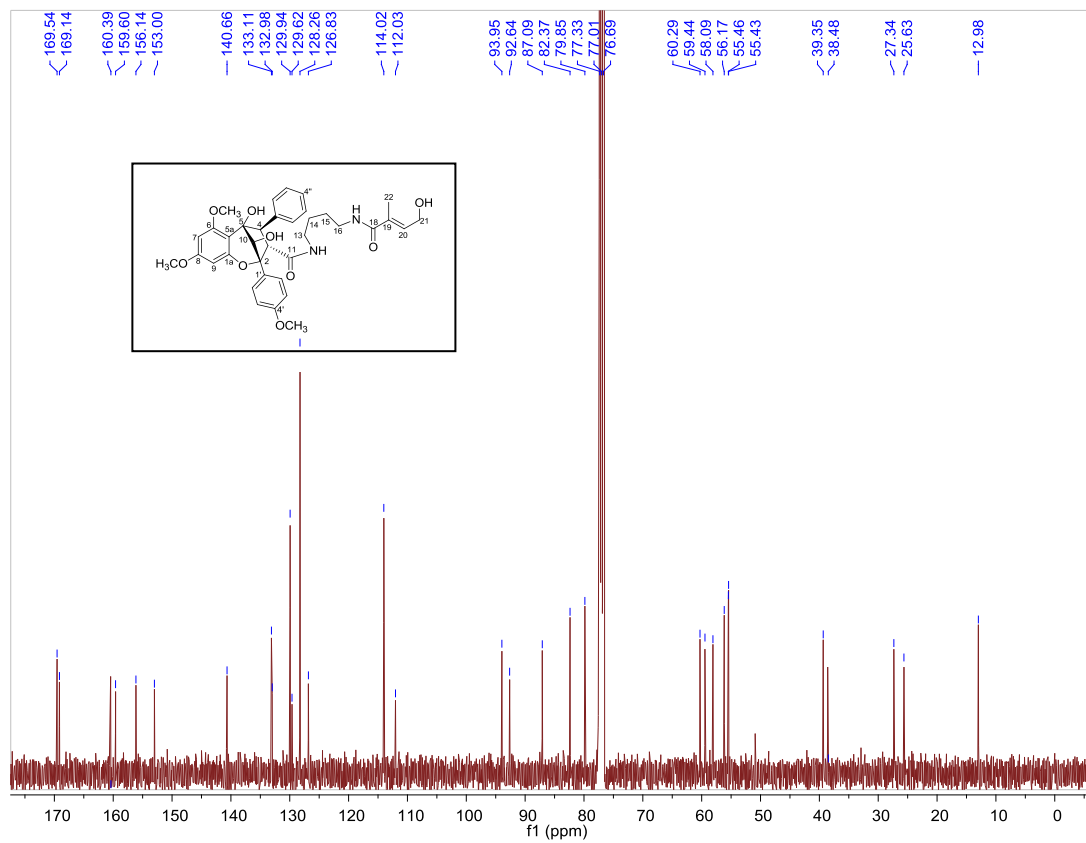



Figure S2-4. HSQC spectrum of compound 2 (CDCl<sub>3</sub>, 400, 100 MHz).

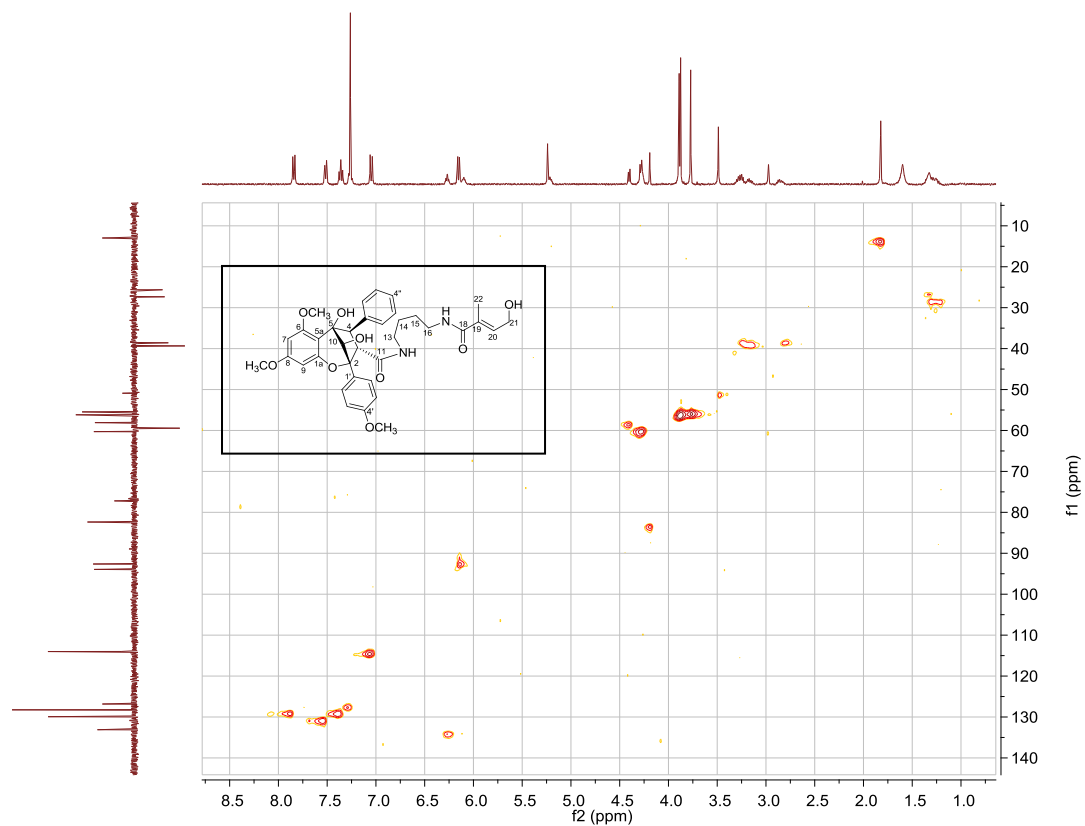

Figure S2-5. HMBC spectrum of compound 2 (CDCl<sub>3</sub>, 400, 100 MHz).

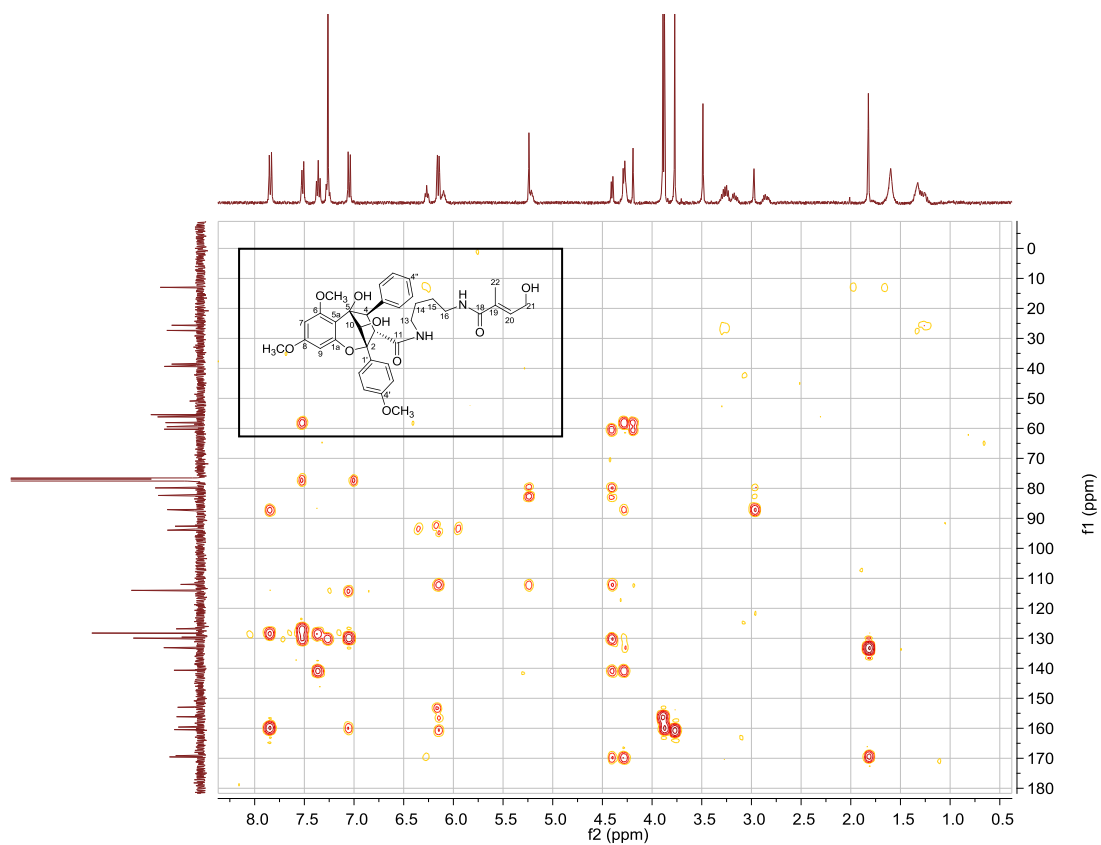

**Figure S2-6.**  $^1\text{H}$ - $^1\text{H}$  COSY spectrum of compound **2** ( $\text{CDCl}_3$ , 400 MHz).

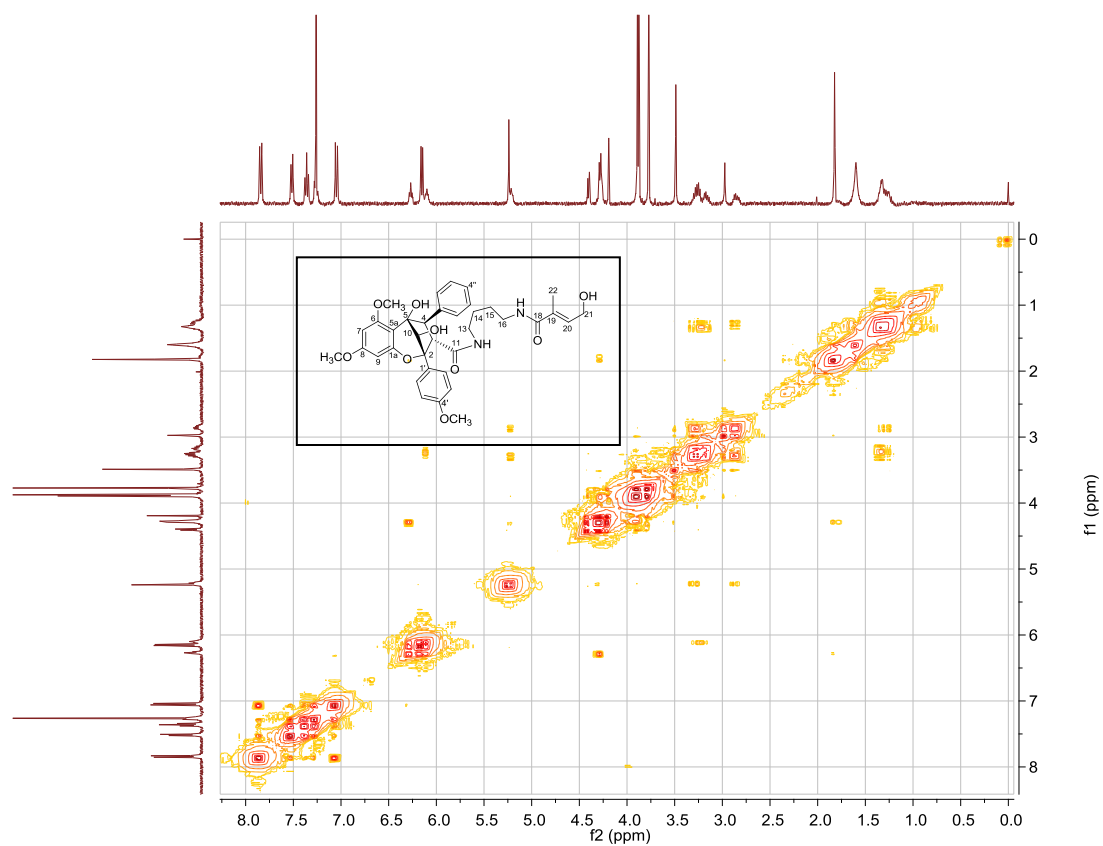

**Figure S2-7.** NOESY spectrum of compound **2** ( $\text{CDCl}_3$ , 400 MHz).

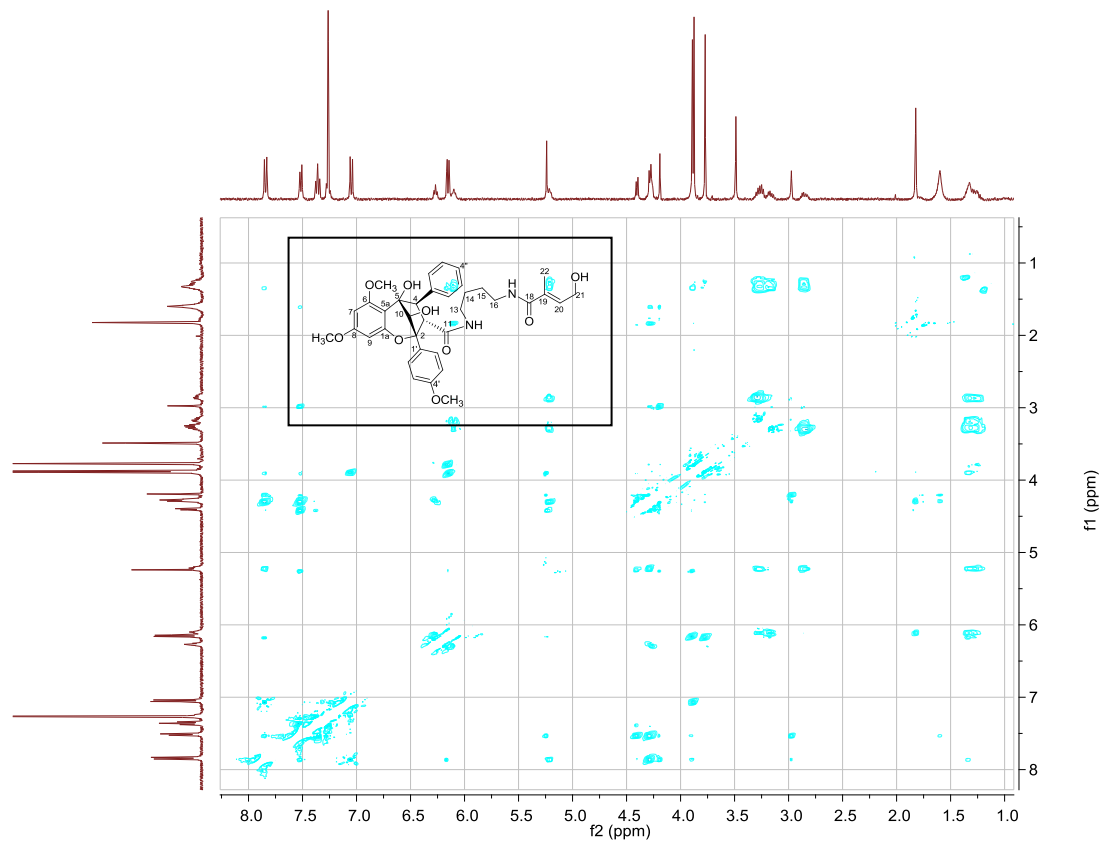

**Figure S3-1.**  $^1\text{H}$  NMR spectrum of compound **3** ( $\text{CDCl}_3$ , 400 MHz).

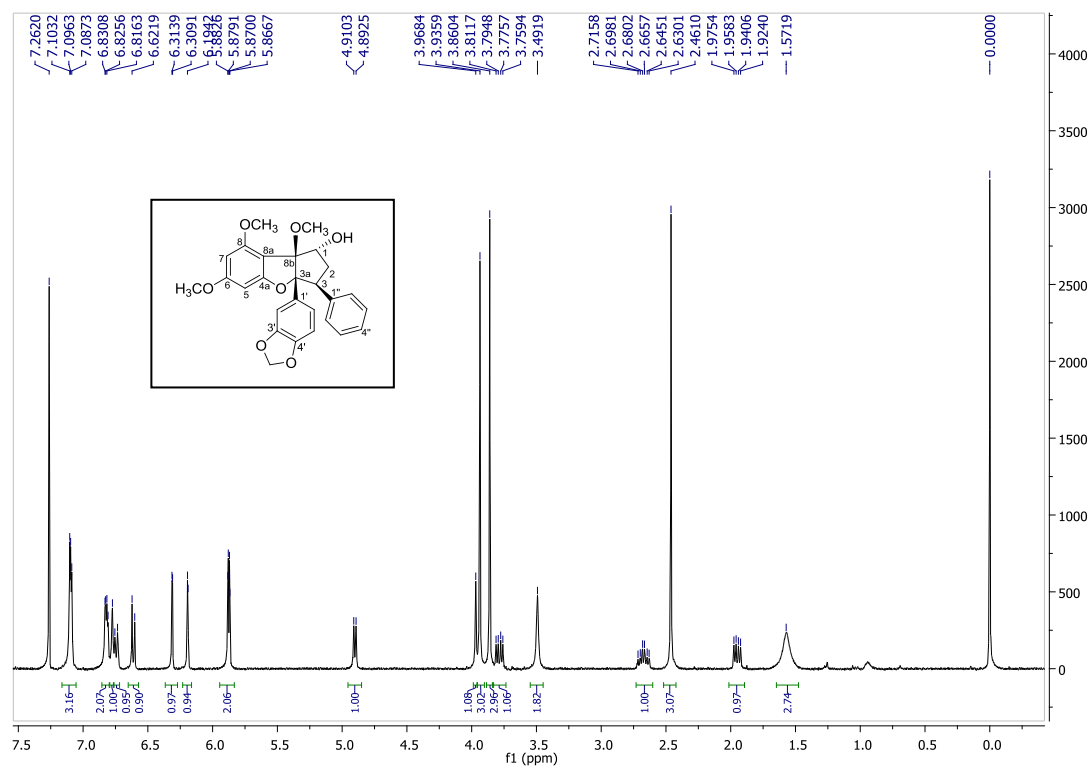

**Figure S3-2.**  $^{13}\text{C}$  DEPT135 spectrum of compound **3** ( $\text{CDCl}_3$ , 100 MHz).

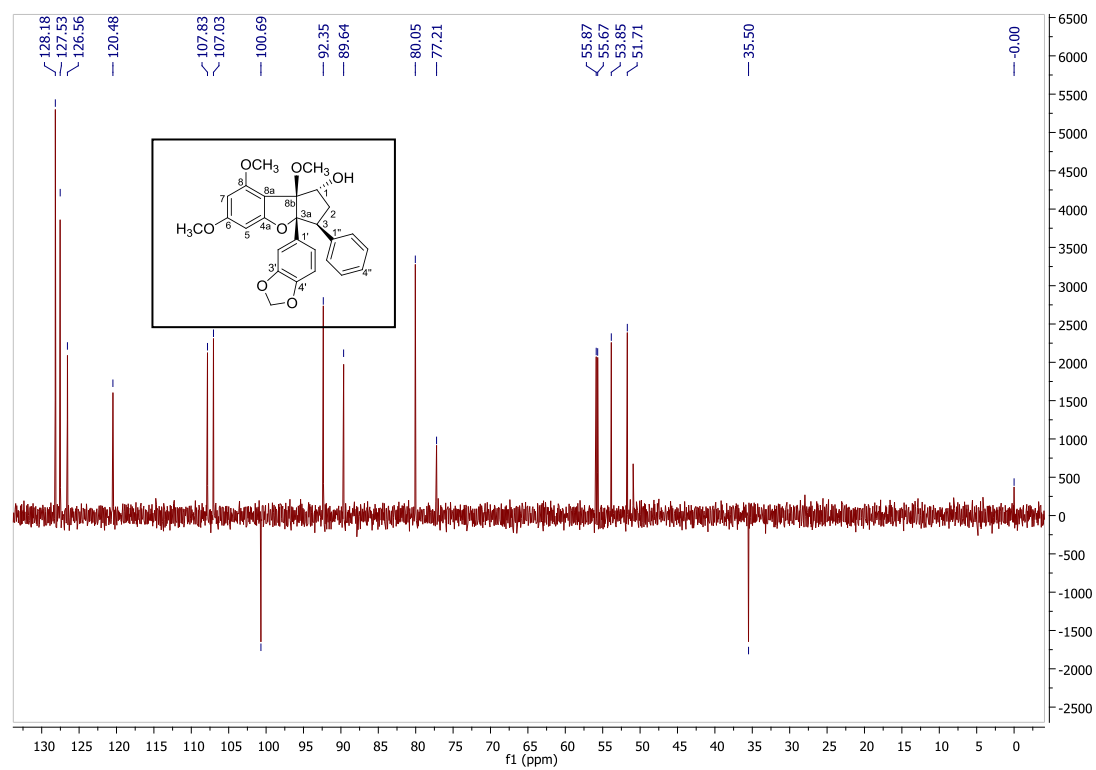

Figure S3-3.  $^{13}\text{C}$  NMR spectrum of compound **3** ( $\text{CDCl}_3$ , 100 MHz).

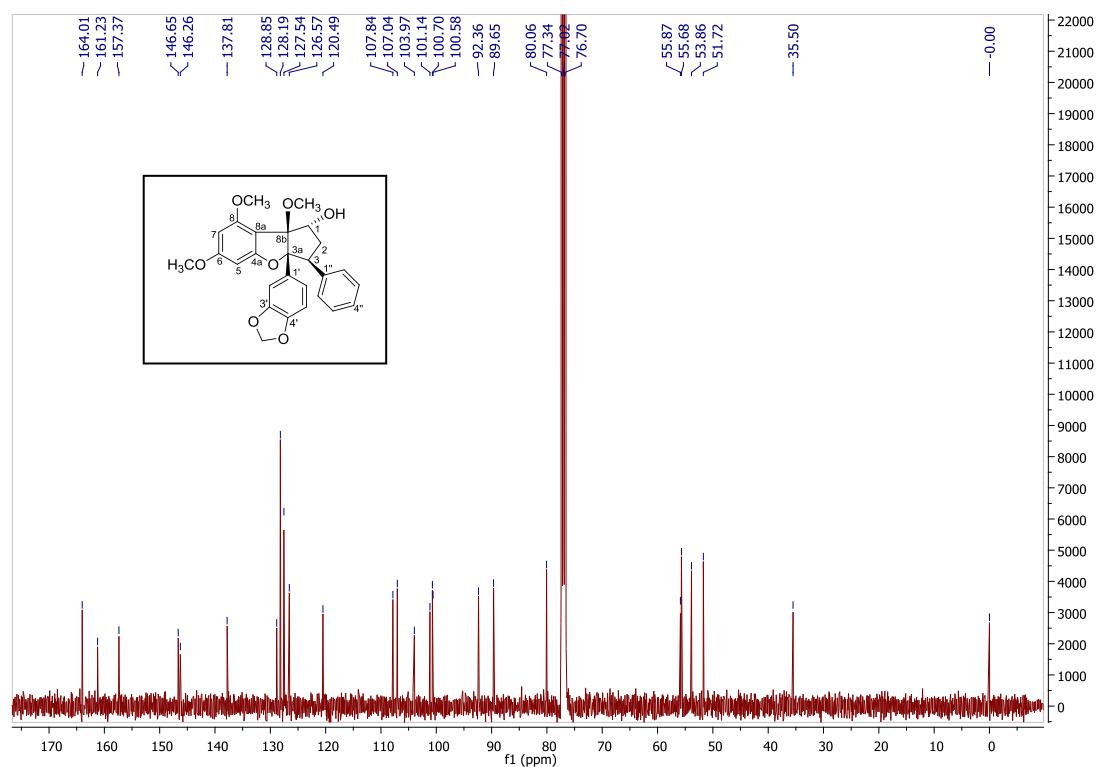

Figure S3-4. HSQC spectrum of compound **3** ( $\text{CDCl}_3$ , 400, 100 MHz).

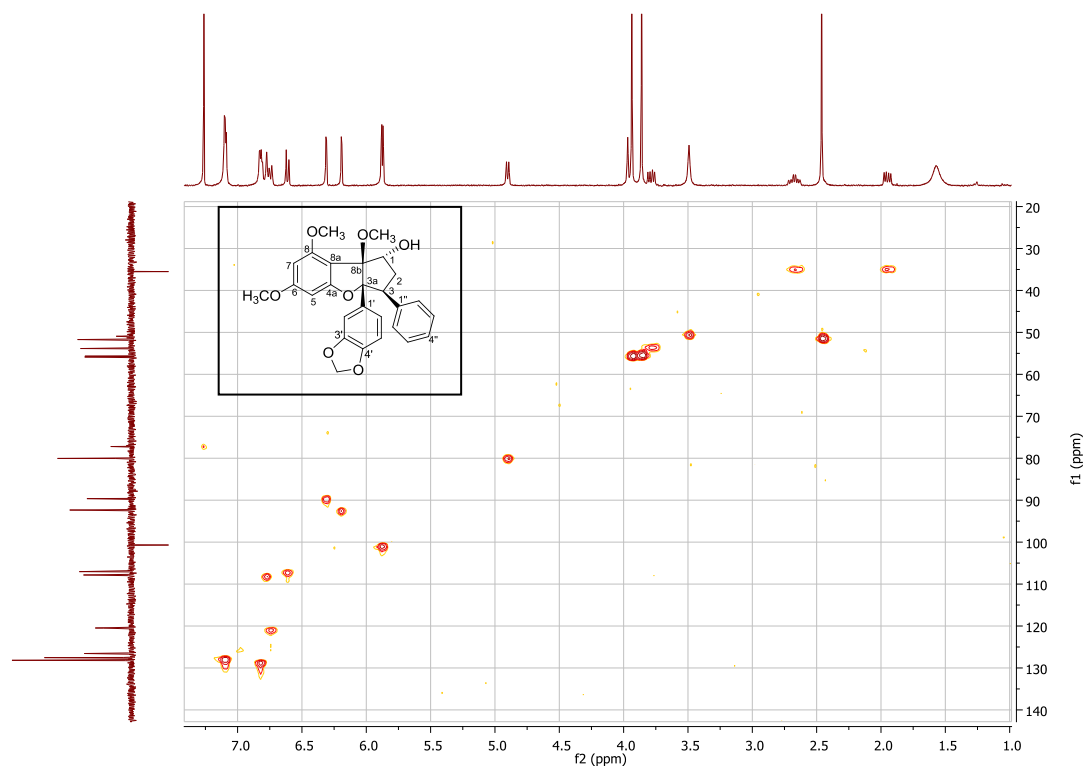

Figure S3-5. HMBC spectrum of compound **3** (CDCl<sub>3</sub>, 400, 100 MHz).

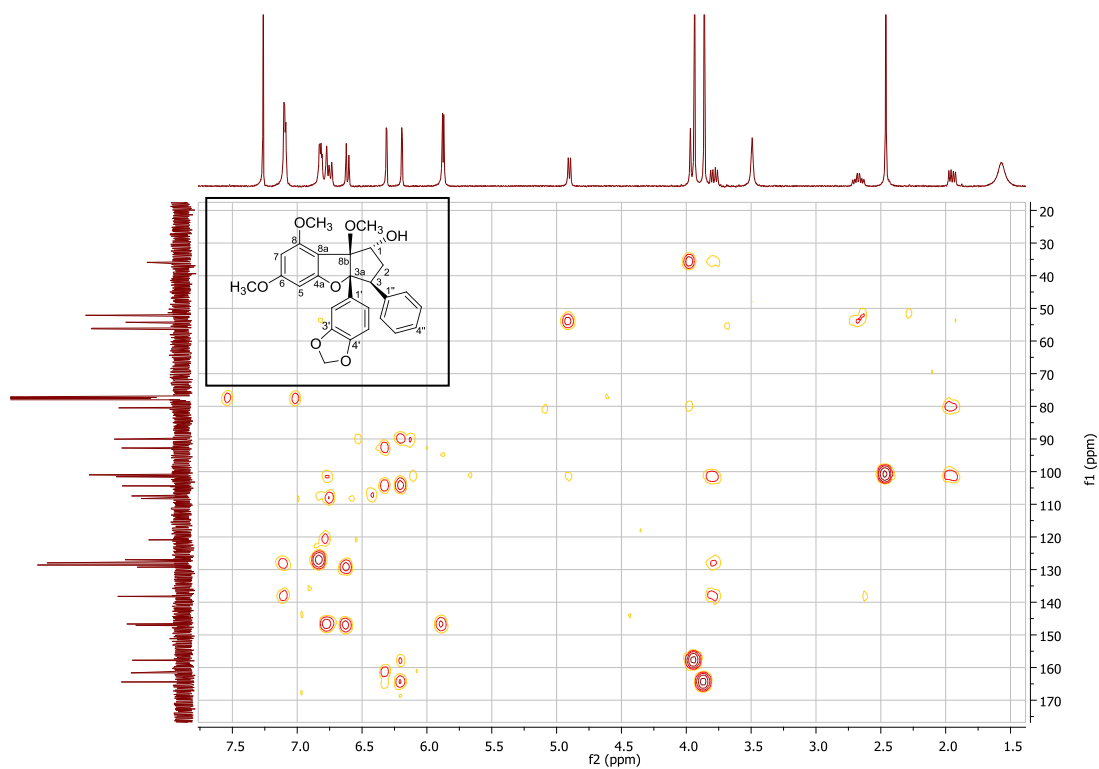

Figure S3-6. <sup>1</sup>H-<sup>1</sup>H COSY spectrum of compound **3** (CDCl<sub>3</sub>, 400 MHz).

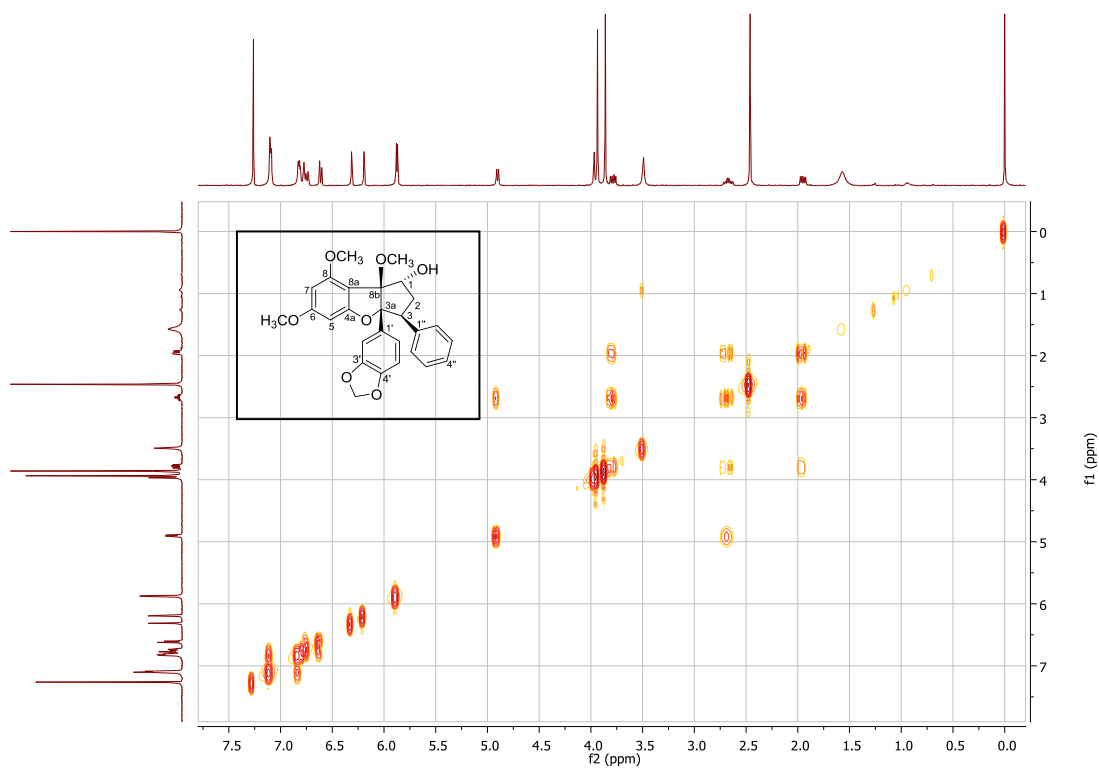

**Figure S3-7.** NOESY spectrum of compound **3** (CDCl<sub>3</sub>, 400 MHz).

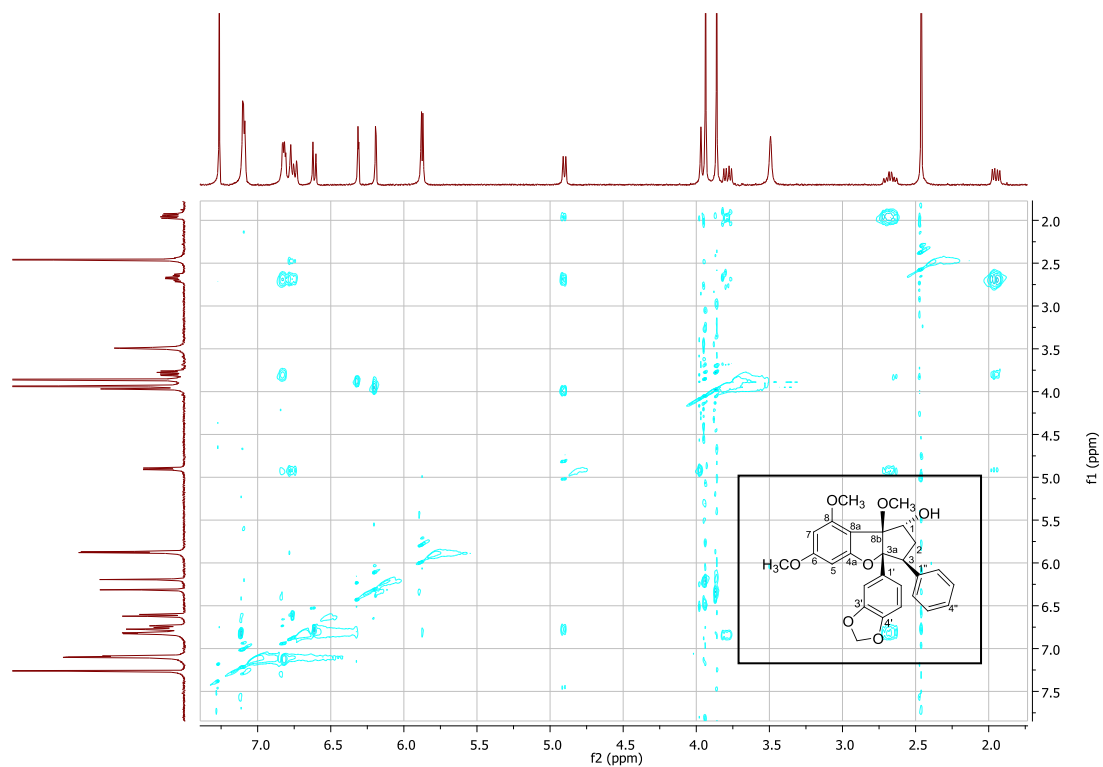

**Figure S4-1.** <sup>1</sup>H NMR spectrum of compound **4** (CDCl<sub>3</sub>, 400 MHz).

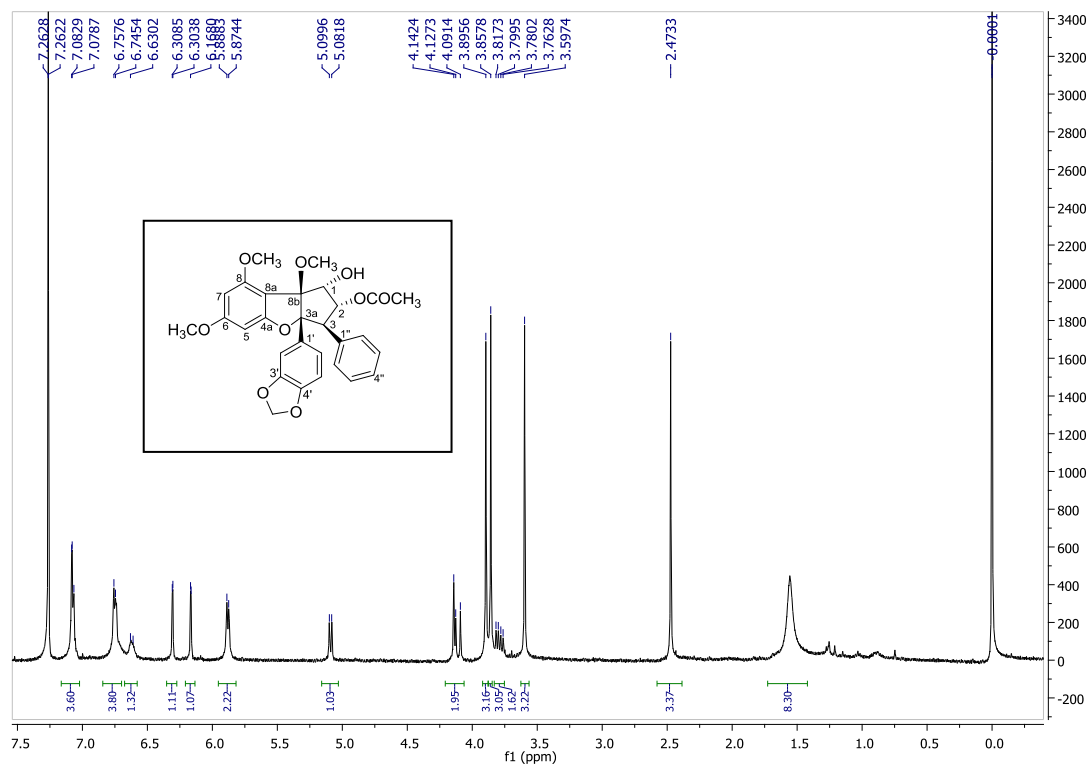

**Figure S4-2.**  $^{13}\text{C}$  DEPT135 spectrum of compound **4** ( $\text{CDCl}_3$ , 100 MHz).

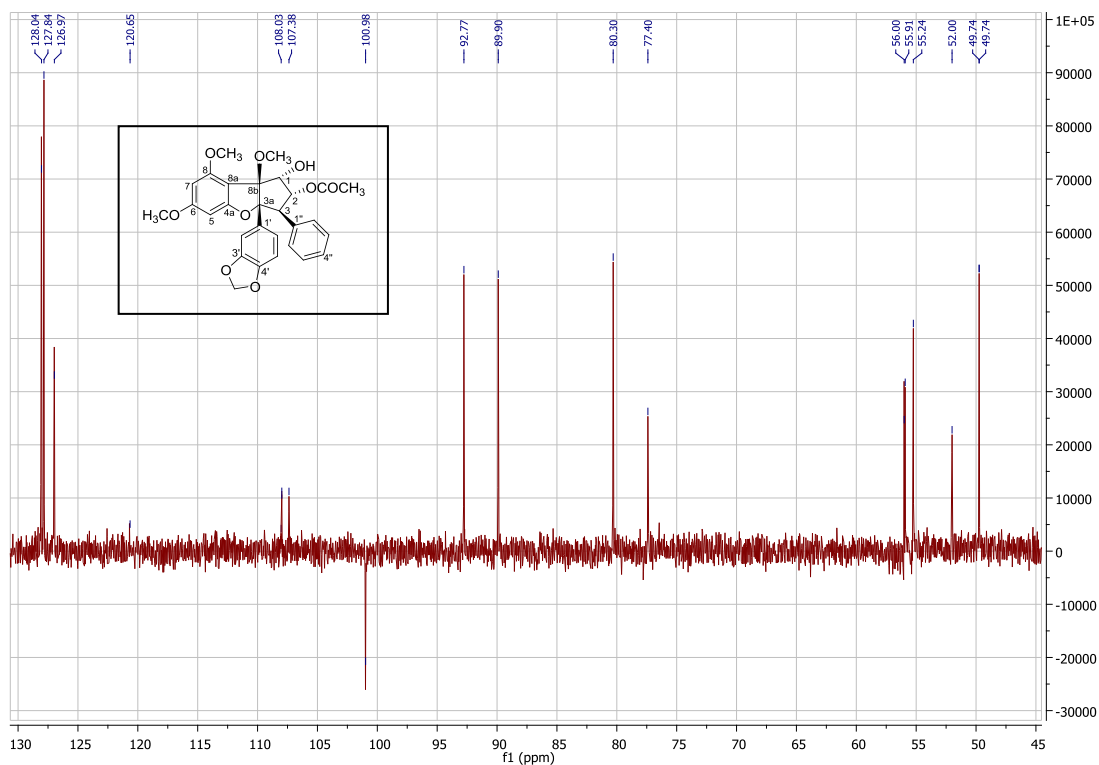

**Figure S4-3.**  $^{13}\text{C}$  NMR spectrum of compound **4** ( $\text{CDCl}_3$ , 100 MHz).

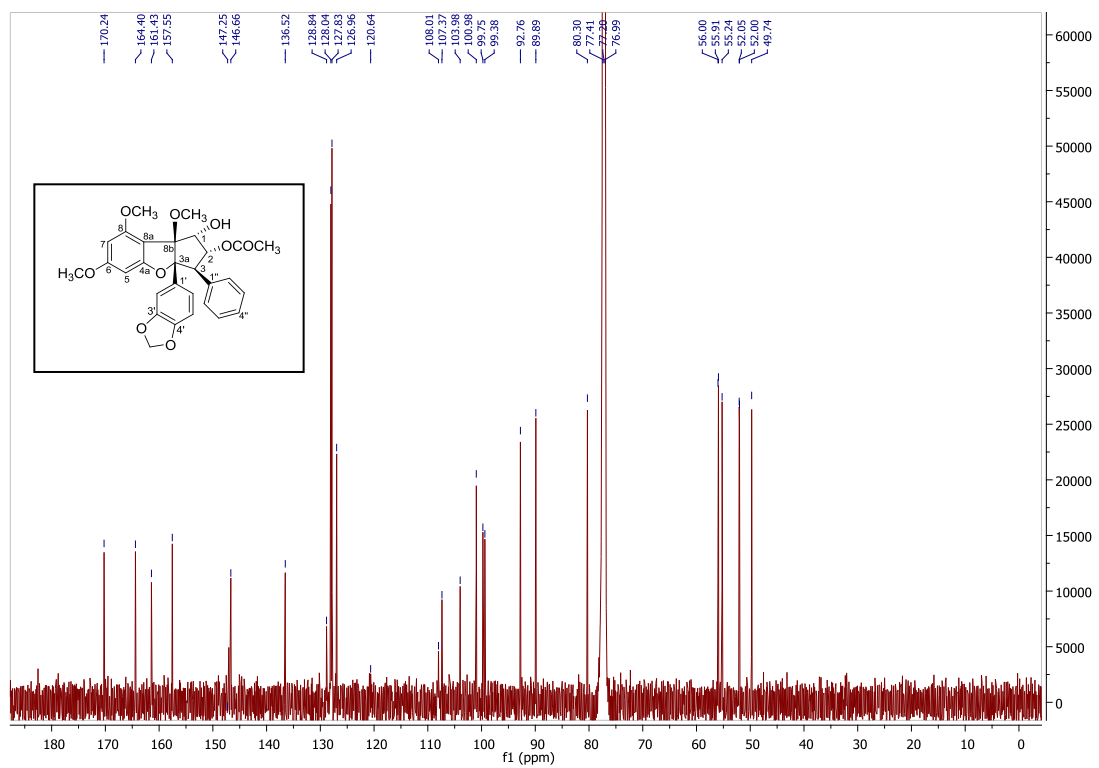

**Figure S4-4.** HSQC spectrum of compound **4** (CDCl<sub>3</sub>, 400, 100 MHz).

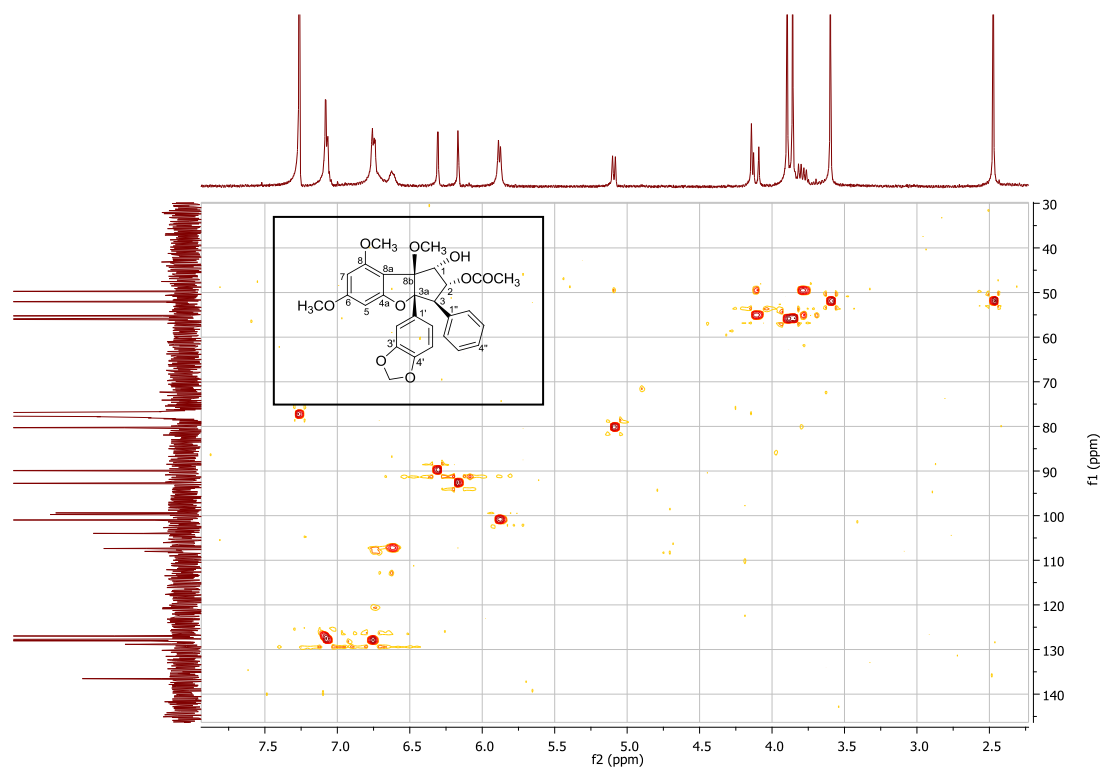

**Figure S4-5.** HMBC spectrum of compound **4** (CDCl<sub>3</sub>, 400, 100 MHz).

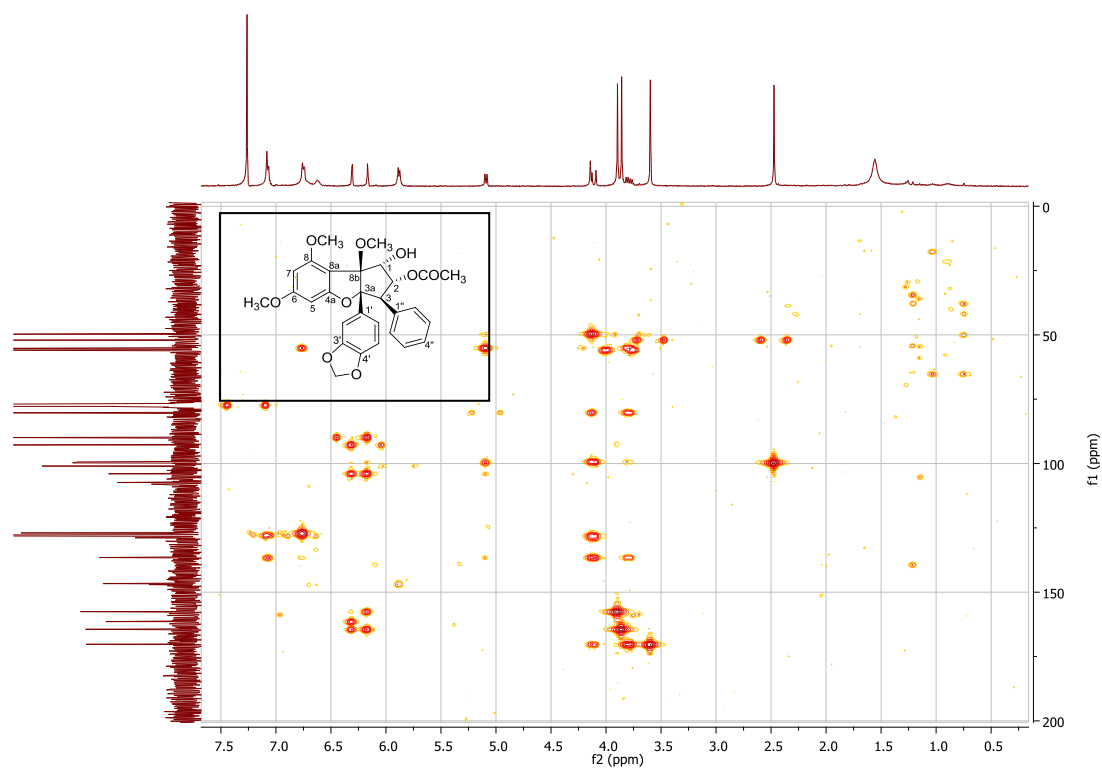



**Figure S4-6.**  $^1\text{H}$ - $^1\text{H}$  COSY spectrum of compound **4** ( $\text{CDCl}_3$ , 400 MHz).

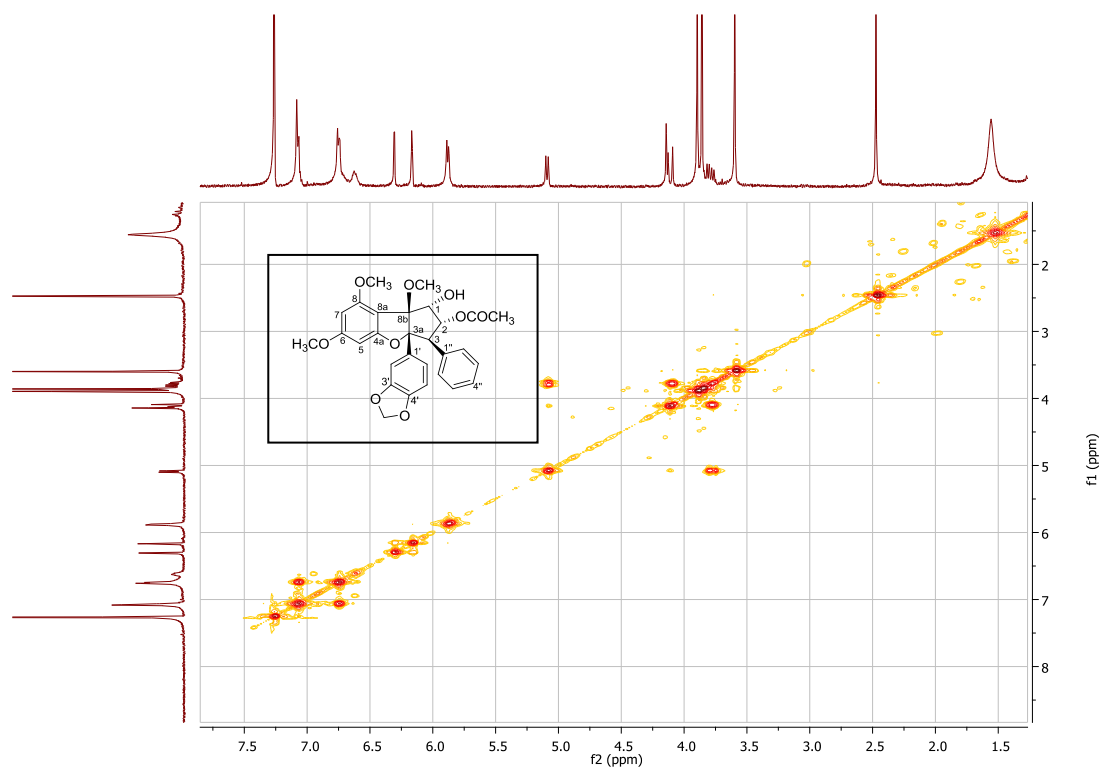

**Figure S4-7.** NOESY spectrum of compound **4** ( $\text{CDCl}_3$ , 400 MHz).

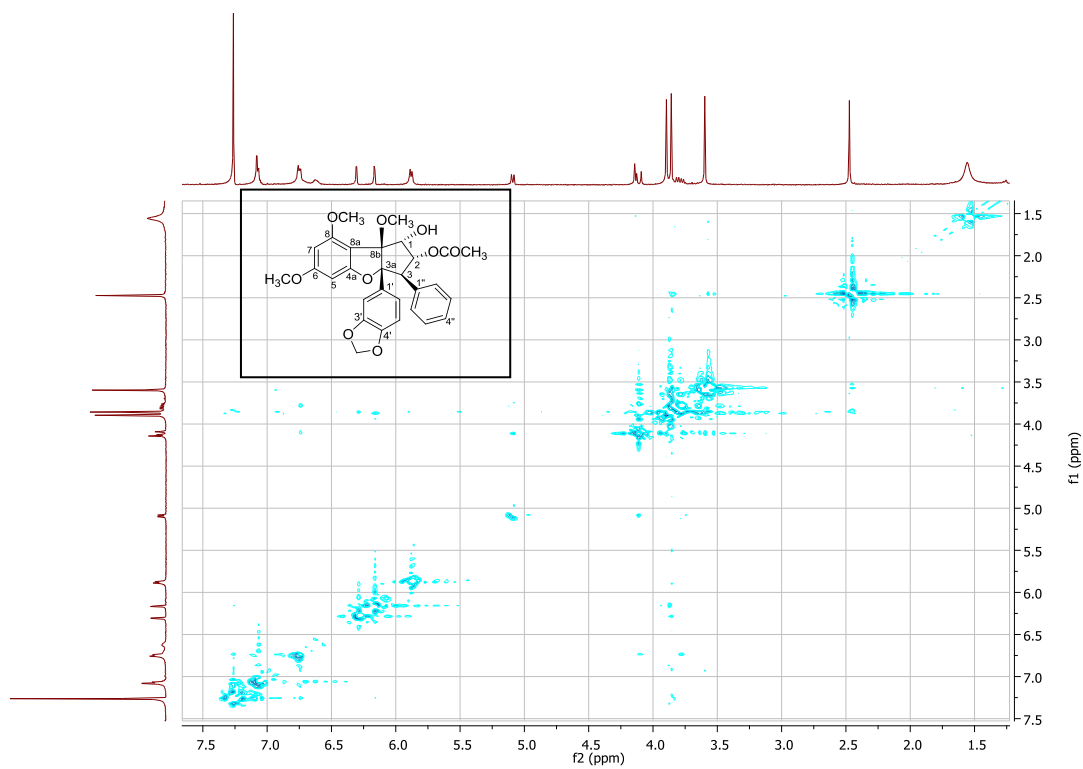

**Figure S5-1.**  $^1\text{H}$  NMR spectrum of compound **5** ( $\text{CDCl}_3$ , 400 MHz).

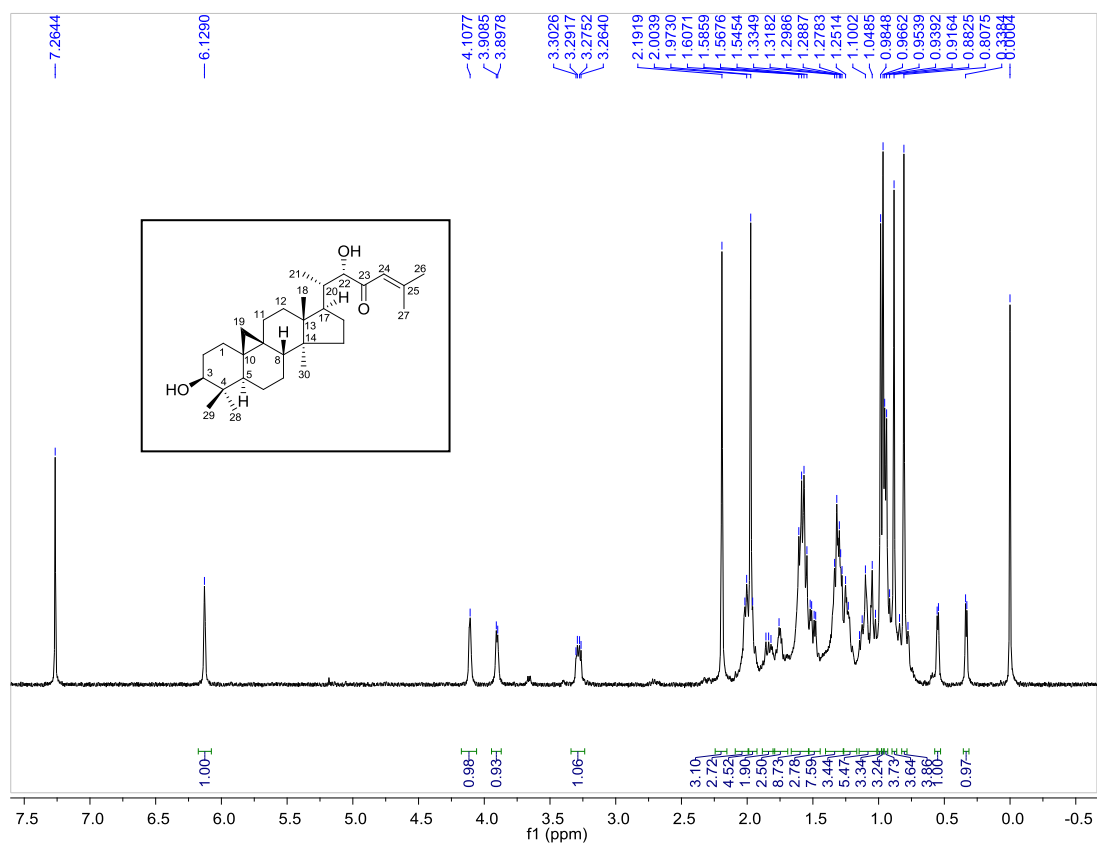

**Figure S5-2.**  $^{13}\text{C}$  DEPT135 spectrum of compound **5** ( $\text{CDCl}_3$ , 100 MHz).

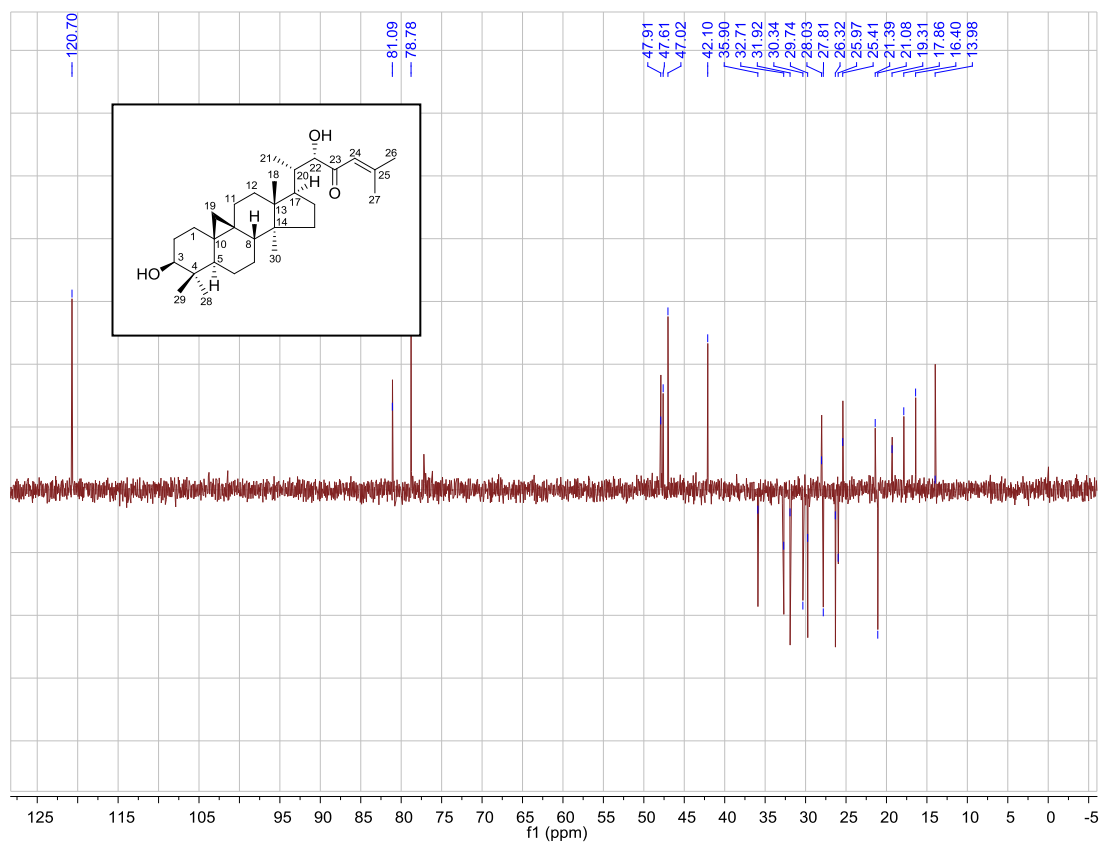

**Figure S5-3.**  $^{13}\text{C}$  NMR spectrum of compound **5** ( $\text{CDCl}_3$ , 100 MHz).

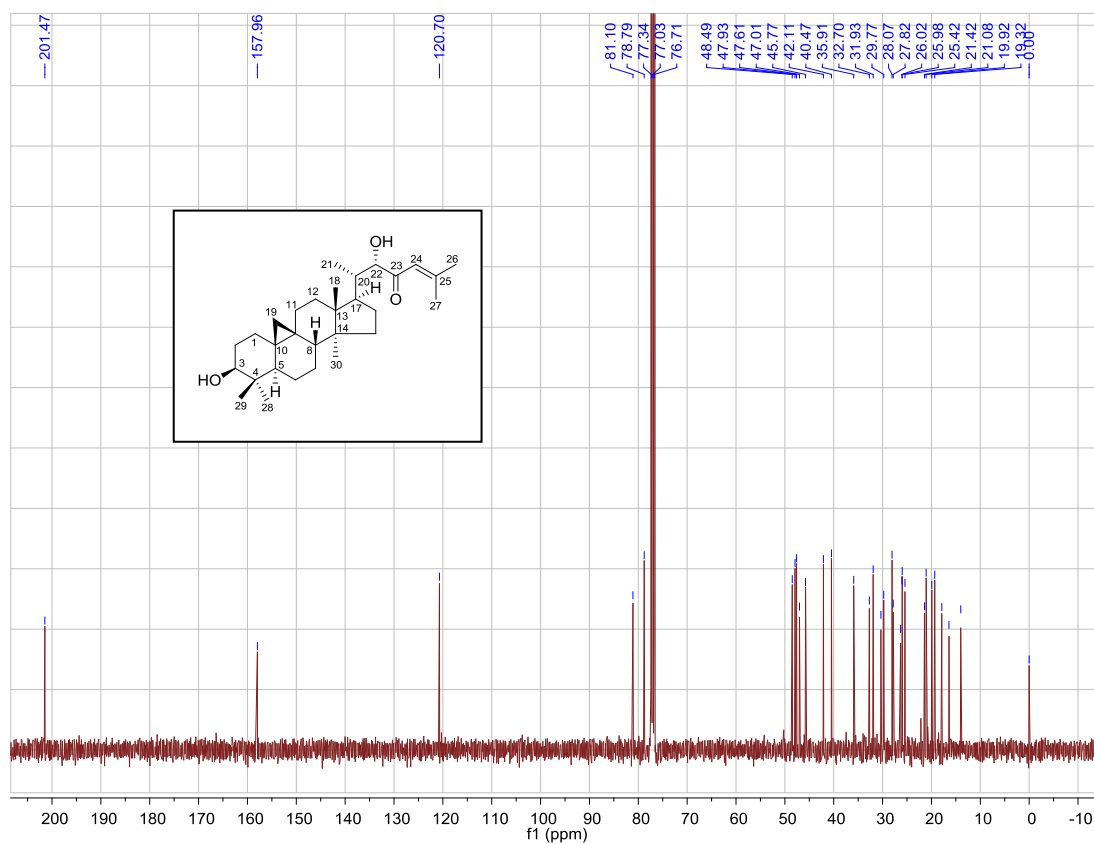

**Figure S5-4.** HSQC spectrum of compound **5** ( $\text{CDCl}_3$ , 400, 100 MHz).

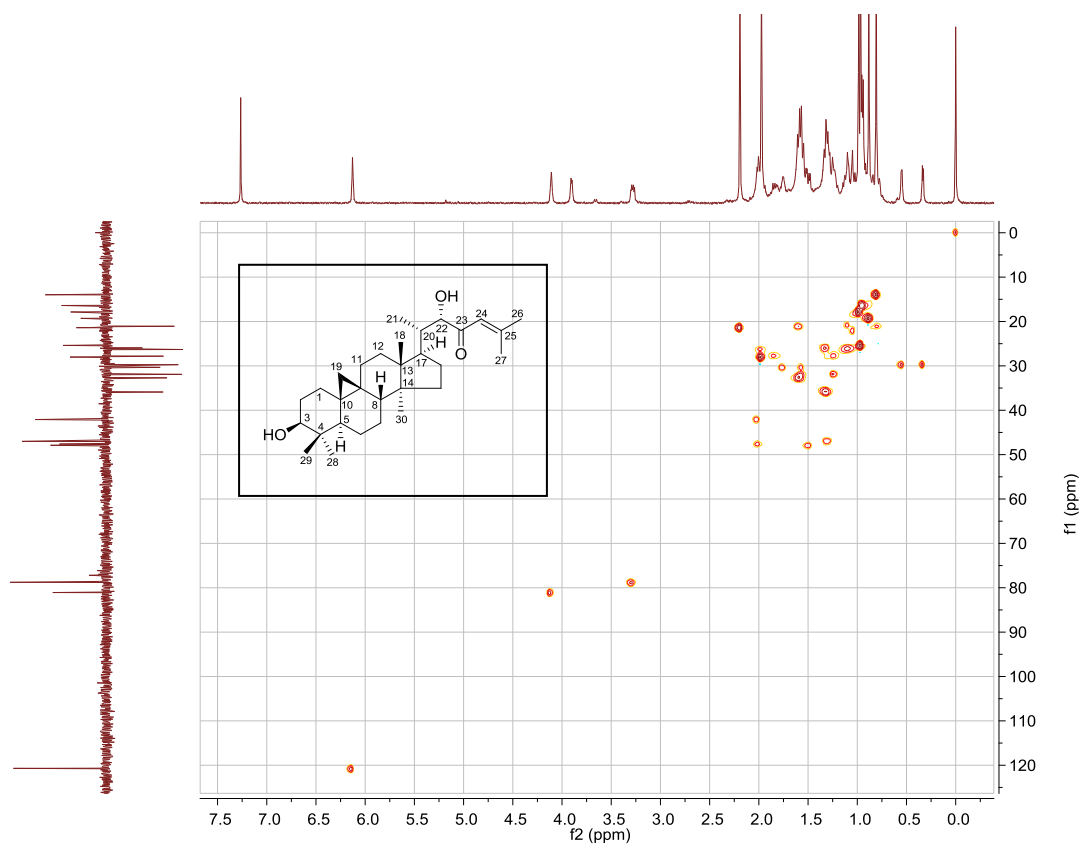

**Figure S5-5.** HMBC spectrum of compound **5** (CDCl<sub>3</sub>, 400, 100 MHz).

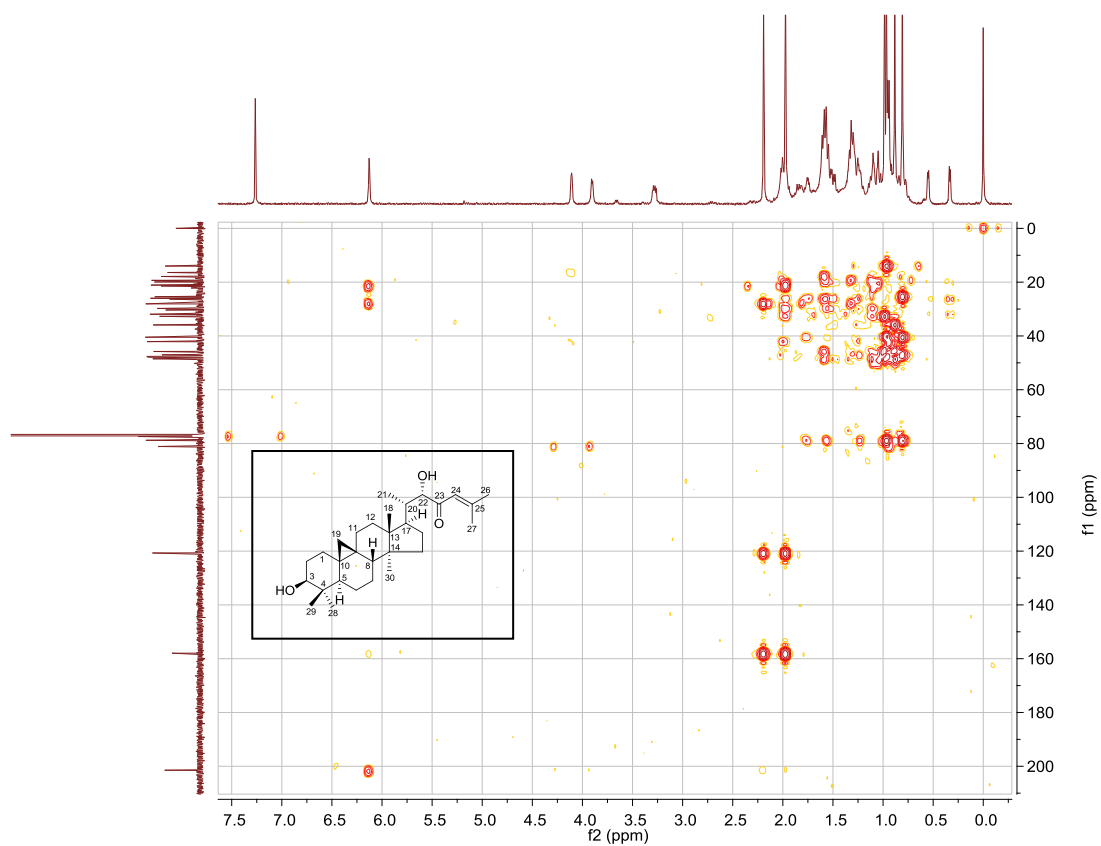

**Figure S5-6.** NOESY spectrum of compound **5** (CDCl<sub>3</sub>, 400 MHz).

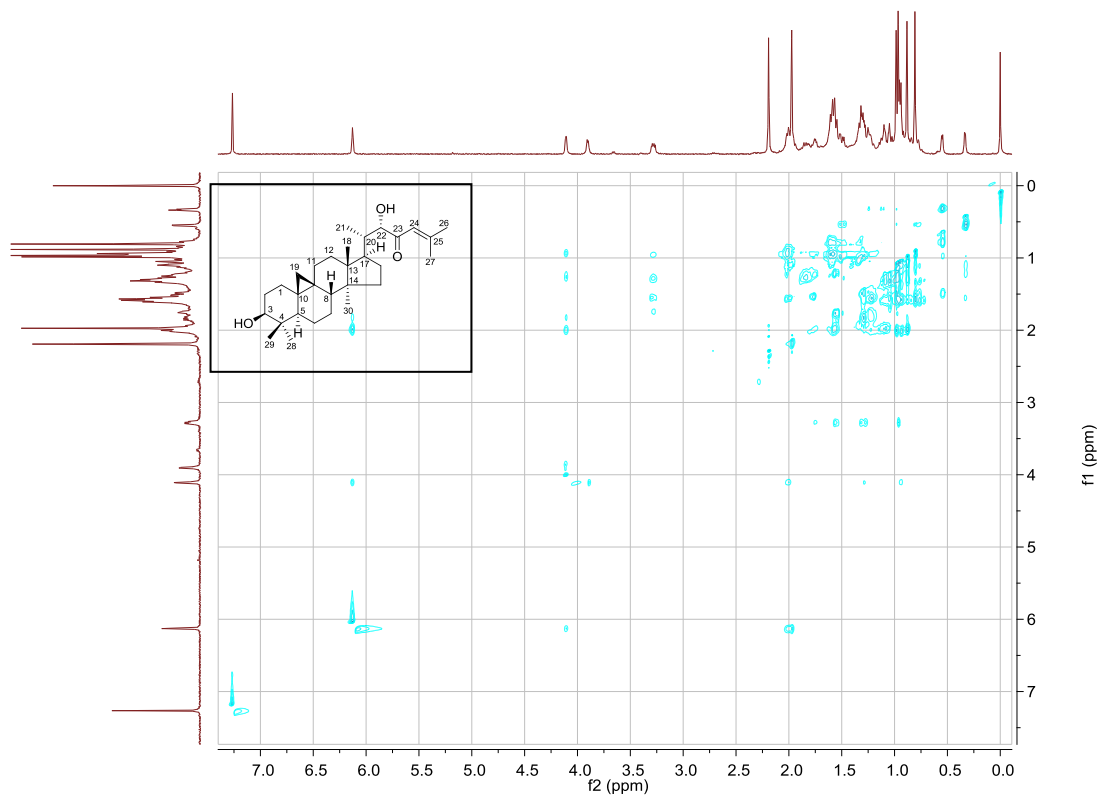

**Figure S5-7.**  $^1\text{H}$  NMR spectrum of (*R*)-MTPA ester of compound **5** (pyridine-*d*<sub>5</sub>, 400 MHz).

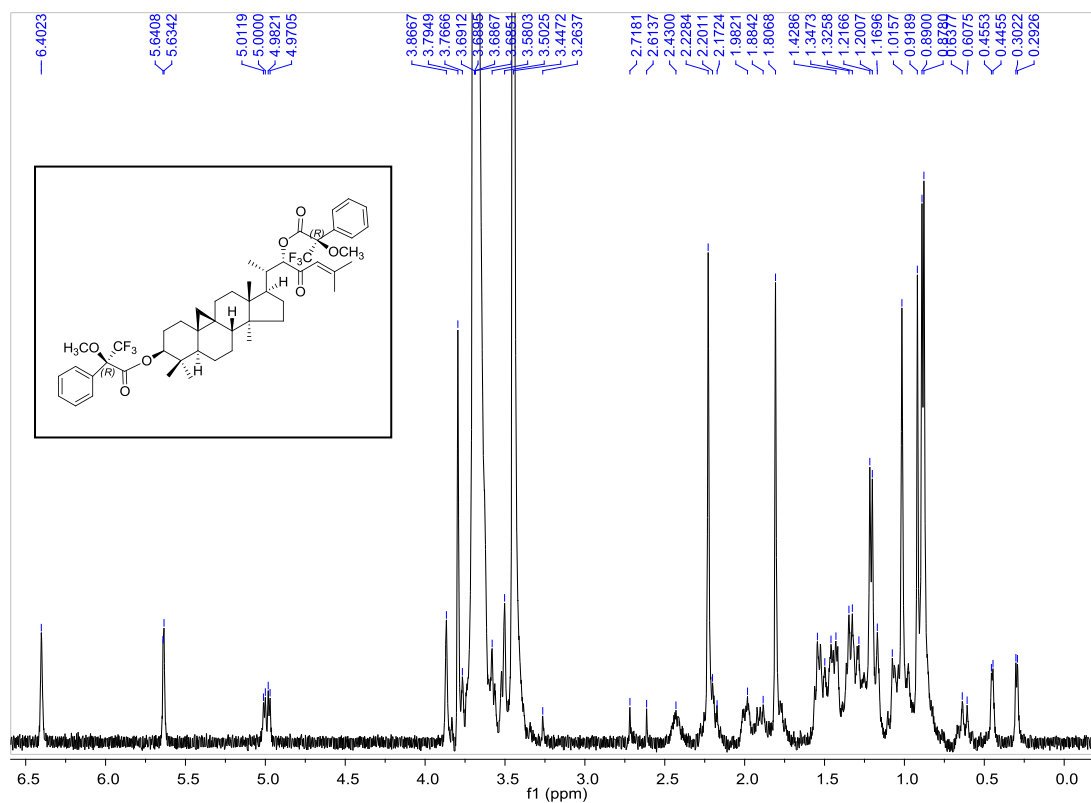

**Figure S5-8.**  $^1\text{H}$  NMR spectrum of (*S*)-MTPA ester of compound **5** (pyridine-*d*<sub>5</sub>, 400 MHz).

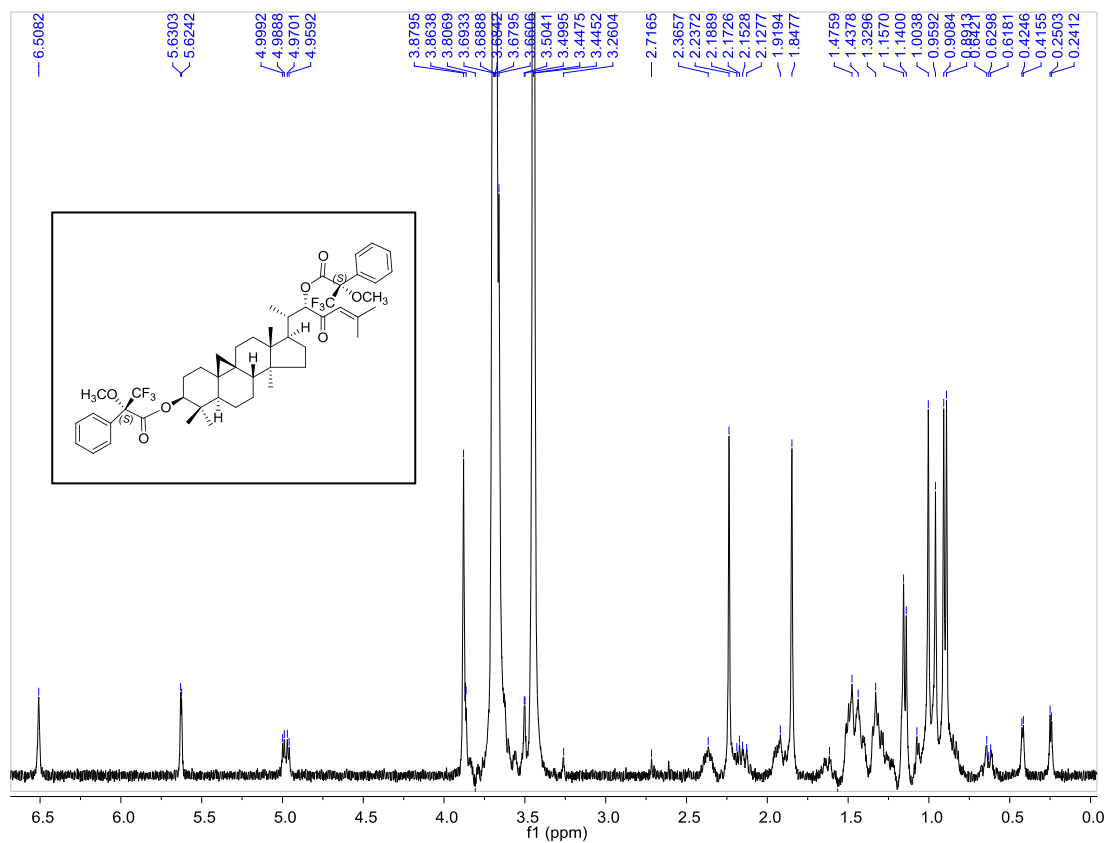

**Figure S6-1.**  $^1\text{H}$  NMR spectrum of compound **6** ( $\text{CDCl}_3$ , 400 MHz).

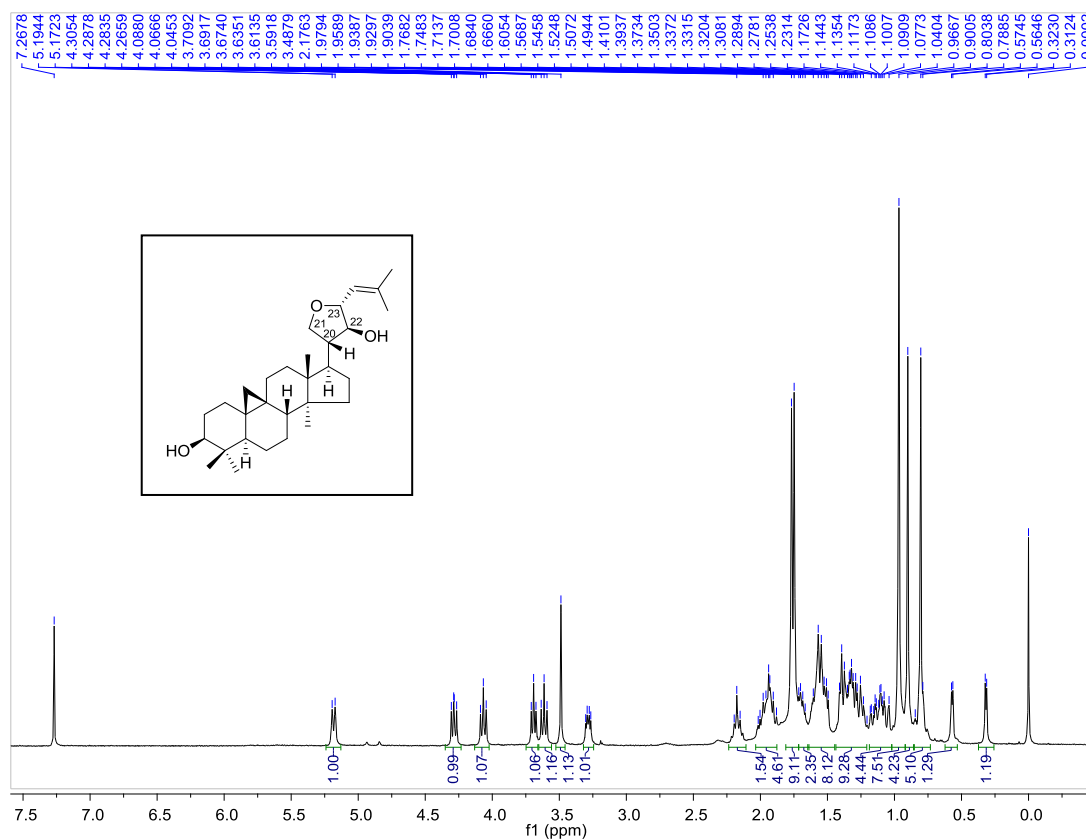

**Figure S6-2.**  $^{13}\text{C}$  DEPT135 spectrum of compound **6** ( $\text{CDCl}_3$ , 100 MHz).

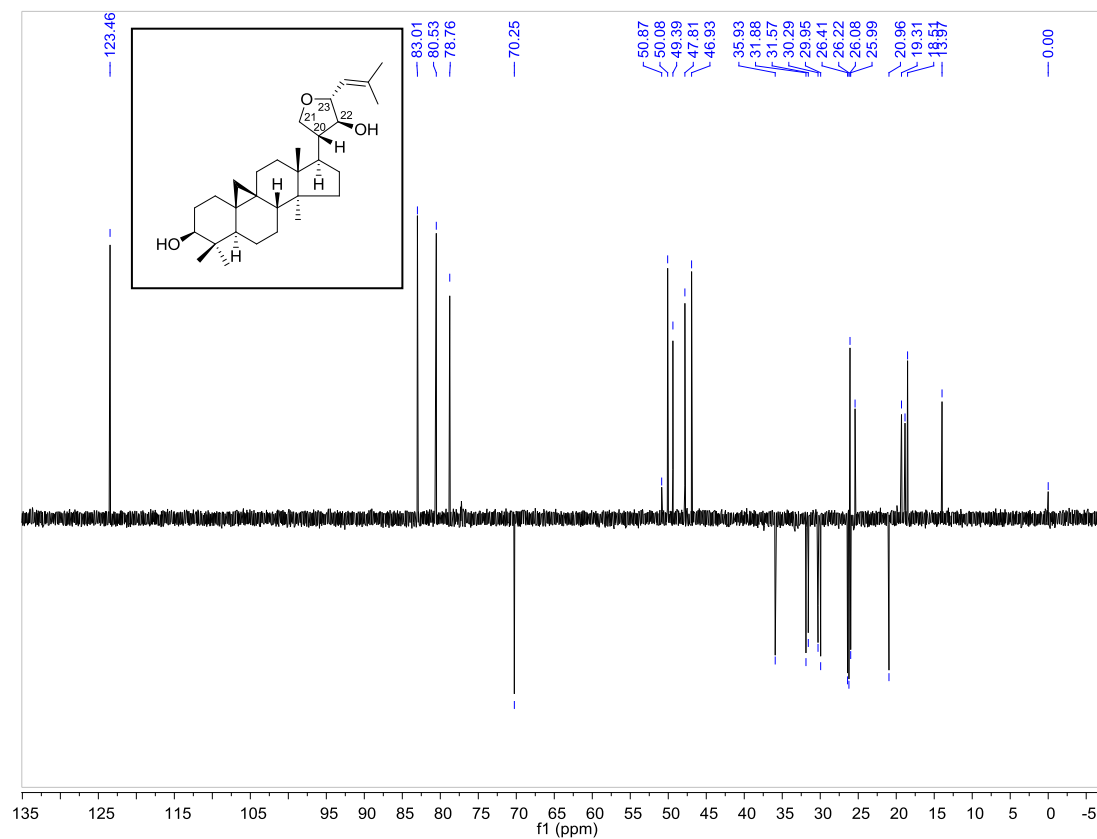

**Figure S6-3.**  $^{13}\text{C}$  NMR spectrum of compound **6** ( $\text{CDCl}_3$ , 100 MHz).

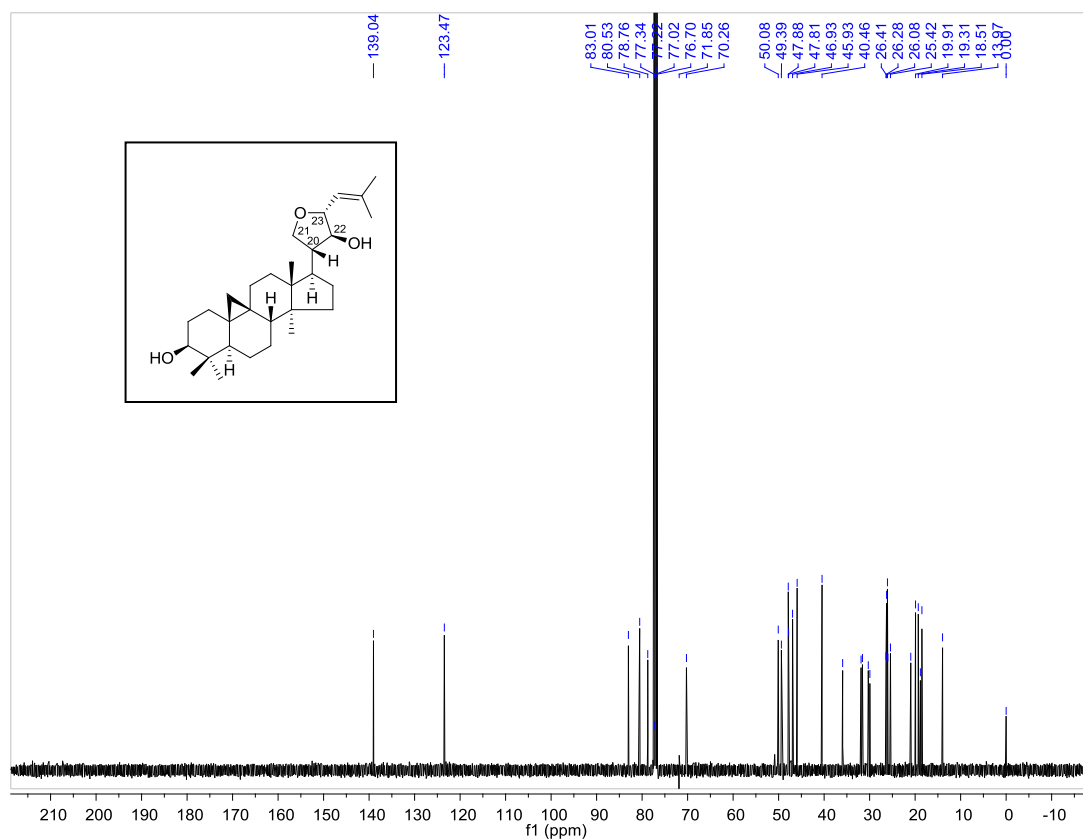

**Figure S6-4.** HSQC spectrum of compound **6** ( $\text{CDCl}_3$ , 400, 100 MHz).

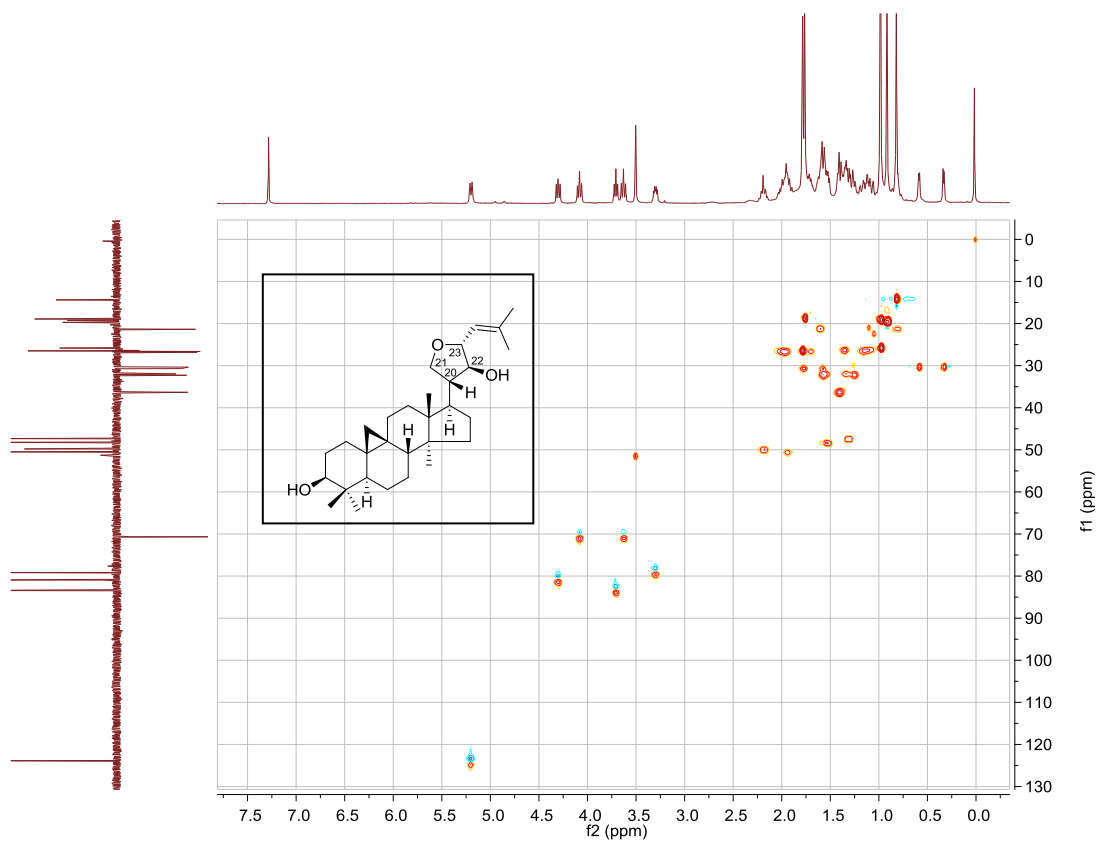

**Figure S6-5.** HMBC spectrum of compound **6** (CDCl<sub>3</sub>, 400, 100 MHz).

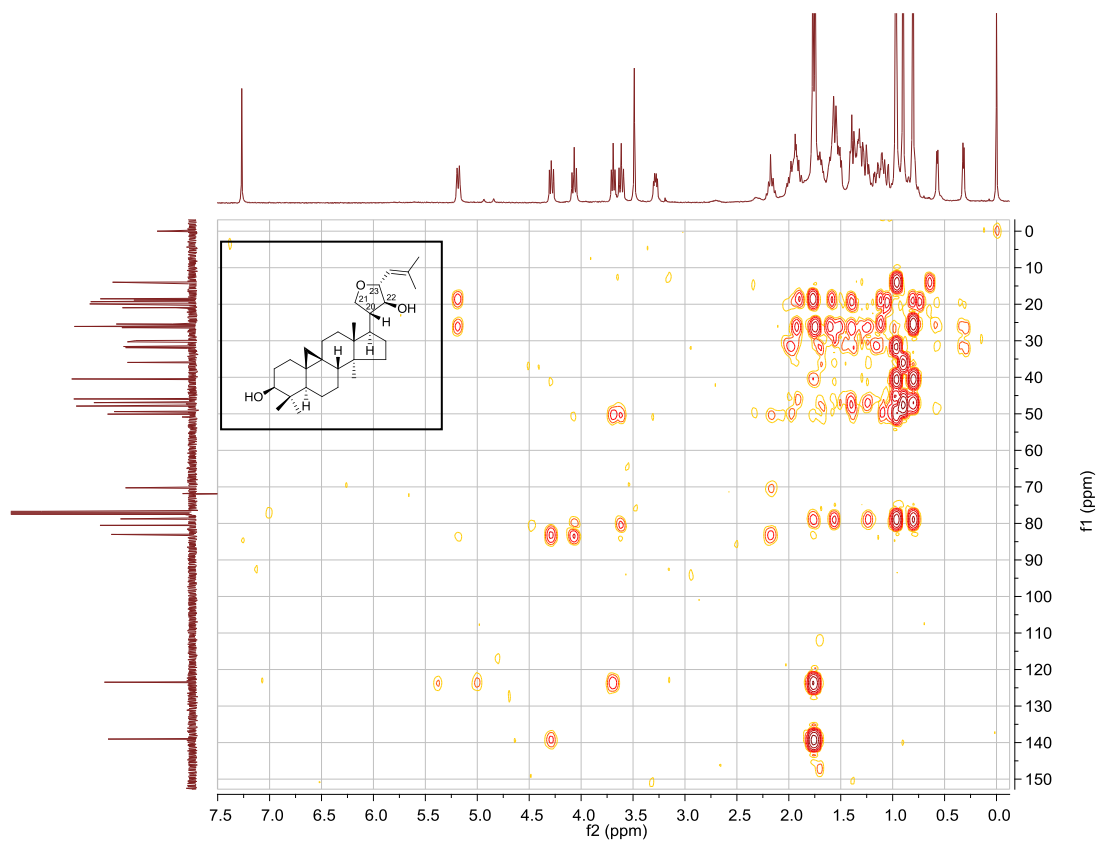

**Figure S6-6.** <sup>1</sup>H-<sup>1</sup>H COSY spectrum of compound **6** (CDCl<sub>3</sub>, 400 MHz).

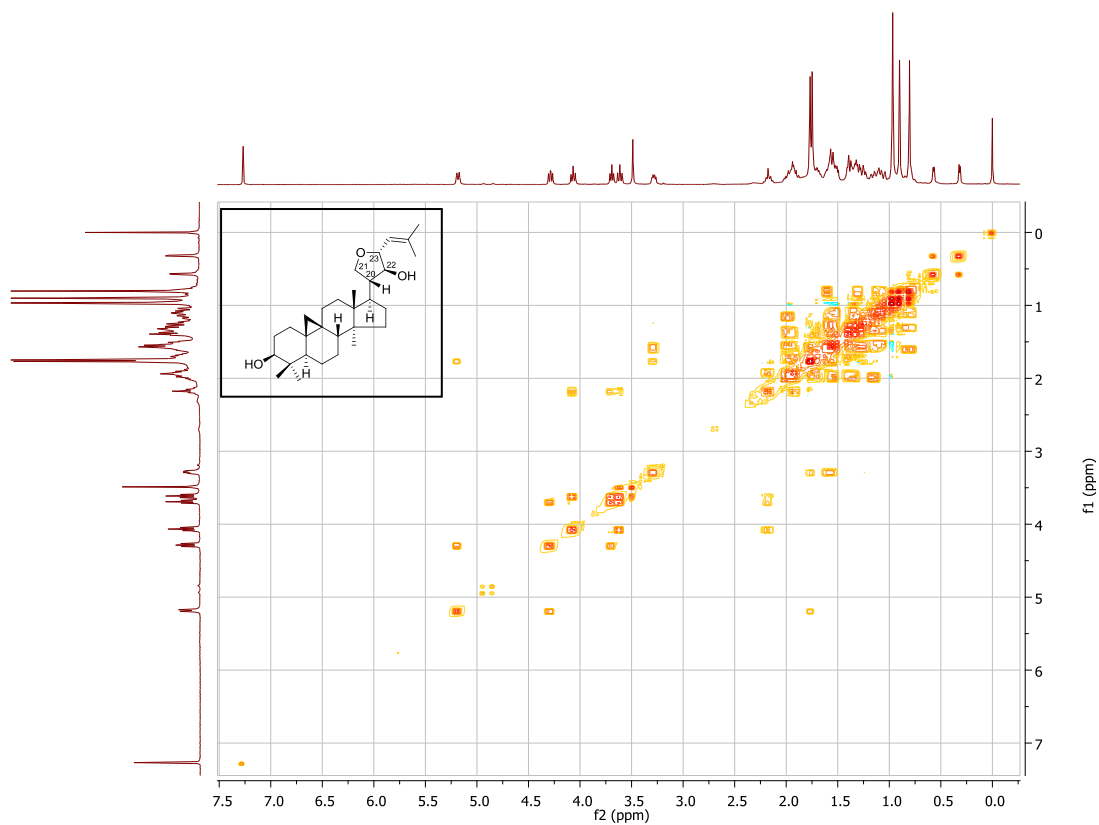



**Figure S6-7.** NOESY spectrum of compound **6** (CDCl<sub>3</sub>, 400 MHz).

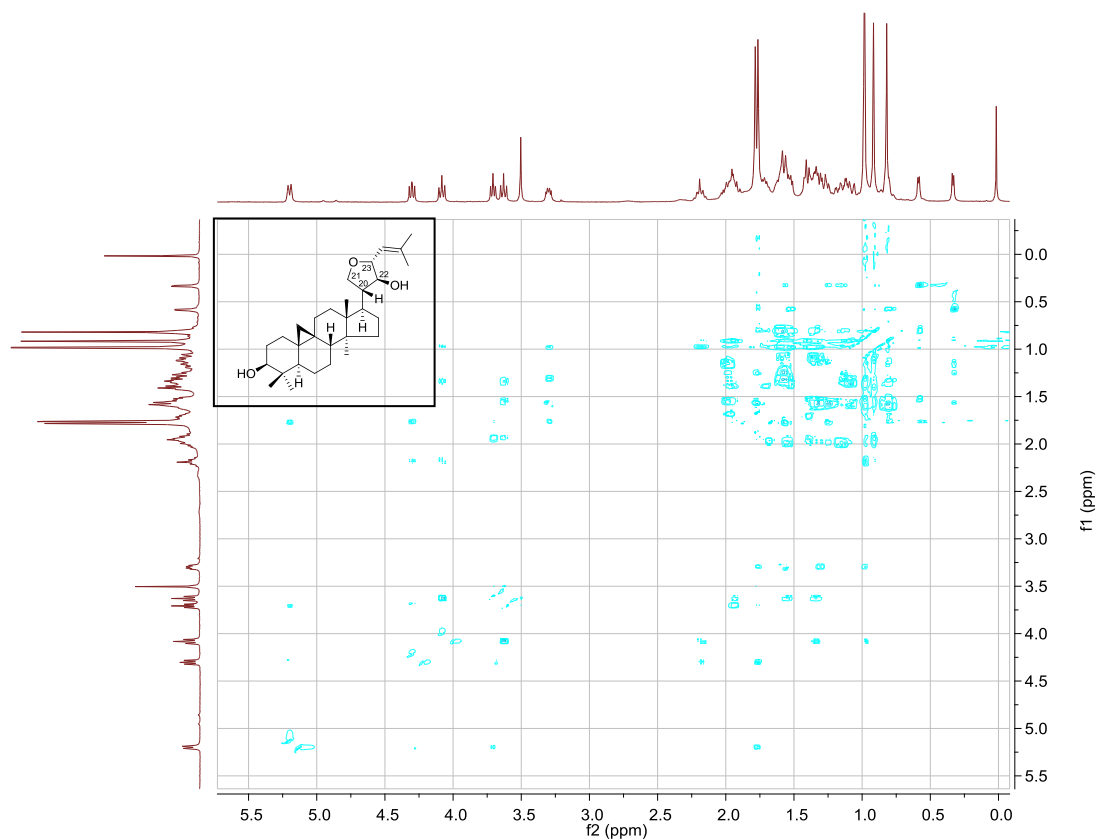

**Figure S6-8.** <sup>1</sup>H NMR spectrum of (*R*)-MTPA ester of compound **6** (pyridine-*d*<sub>5</sub>, 400 MHz).

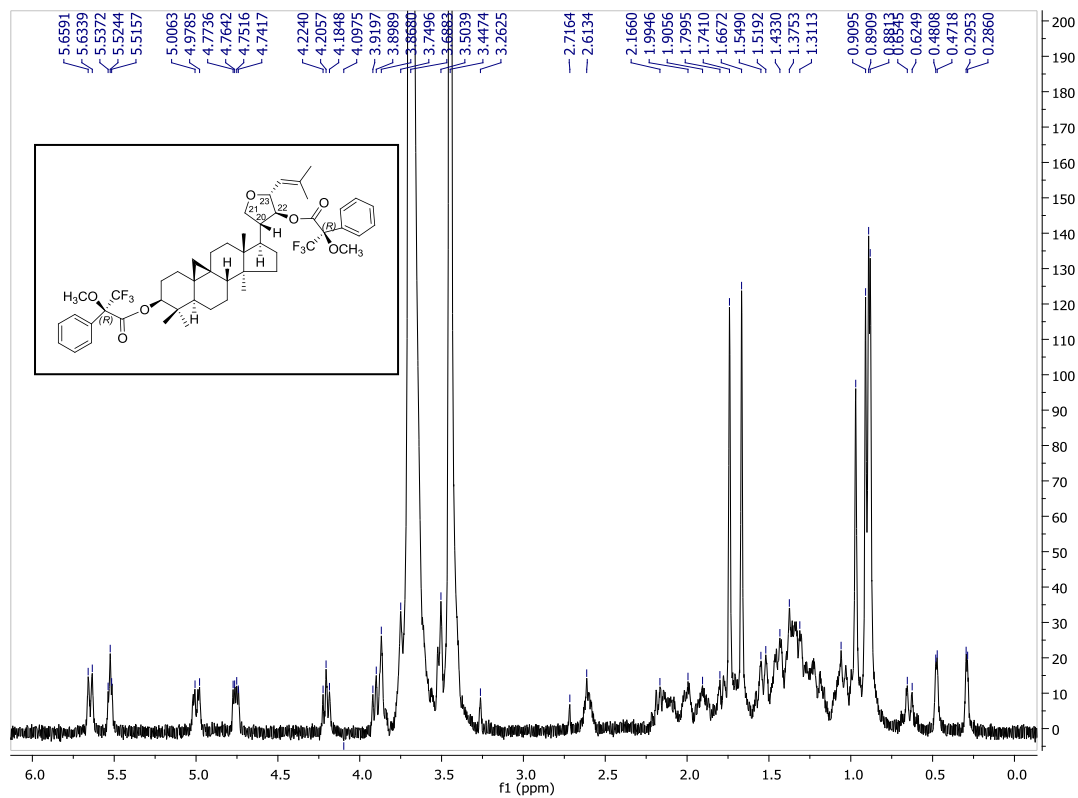

**Figure S6-9.**  $^1\text{H}$  NMR spectrum of (*S*)-MTPA ester of compound **6** (pyridine-*d*<sub>5</sub>, 400 MHz).

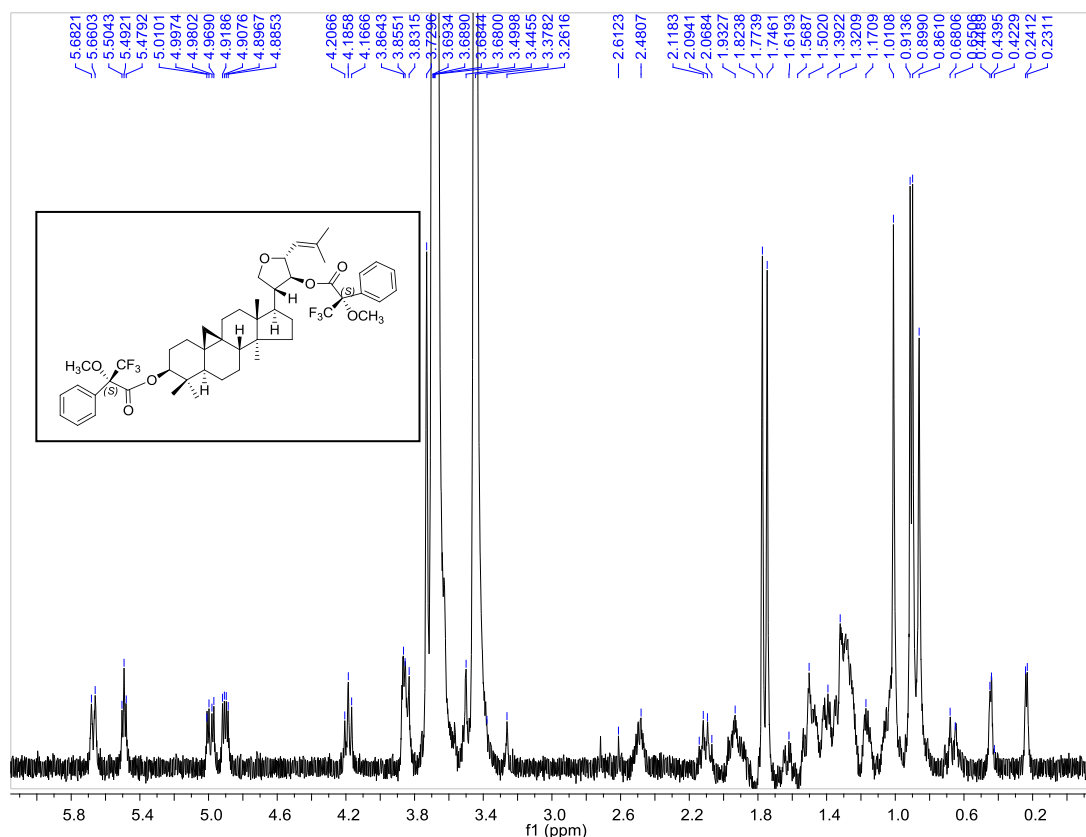

**Figure S7-1.**  $^1\text{H}$  NMR spectrum of compound **7** ( $\text{CDCl}_3$ , 400 MHz).

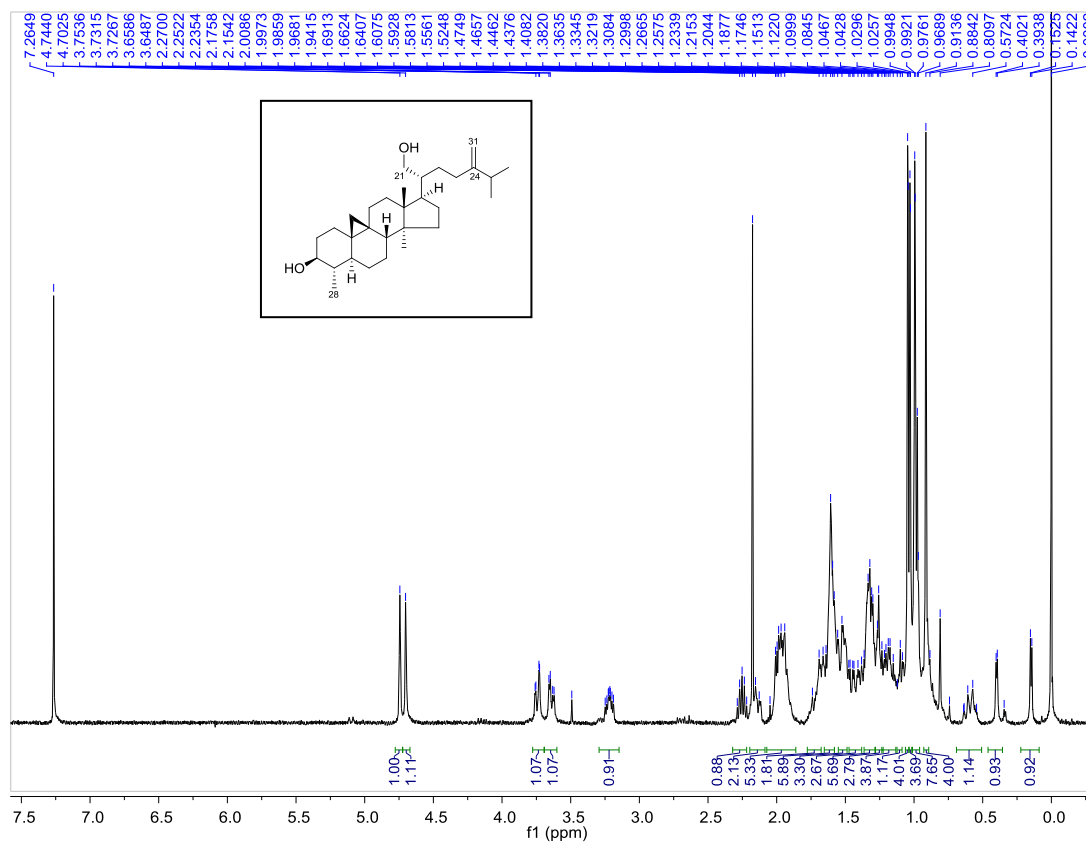

**Figure S7-2.**  $^{13}\text{C}$  DEPT135 spectrum of compound **7** ( $\text{CDCl}_3$ , 100 MHz).

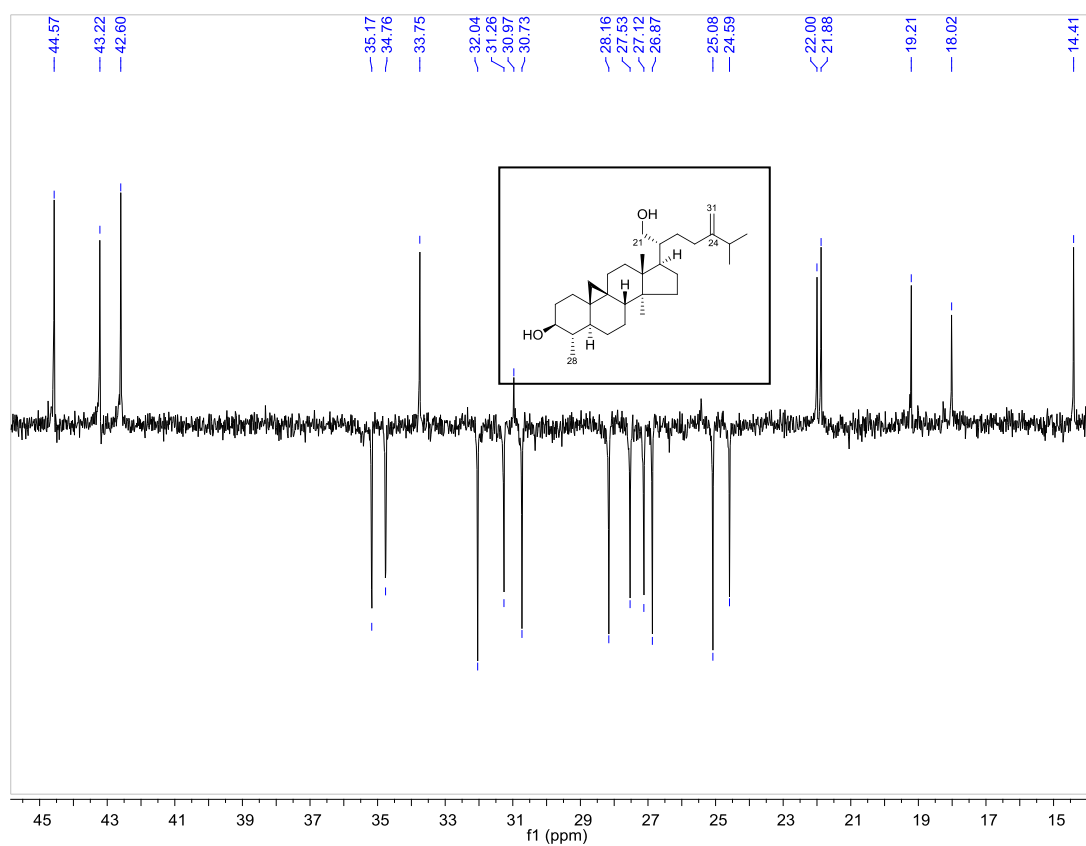

**Figure S7-3.**  $^{13}\text{C}$  NMR spectrum of compound **7** ( $\text{CDCl}_3$ , 100 MHz).

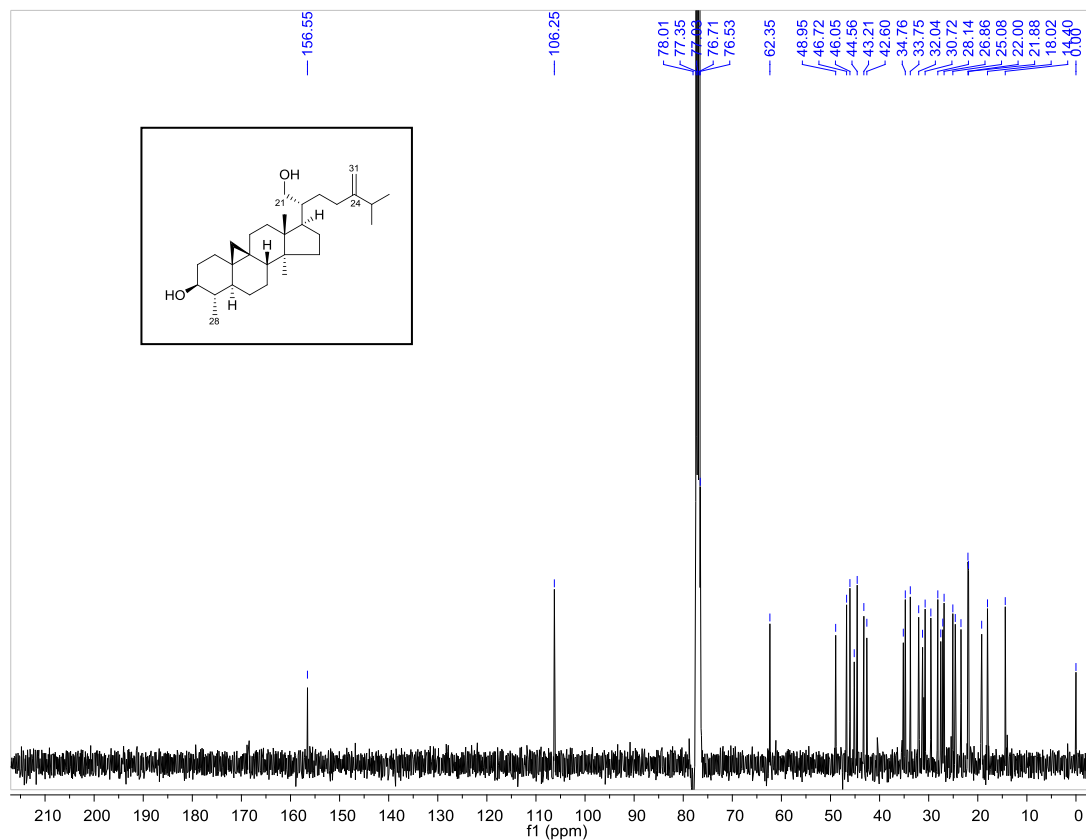

**Figure S7-4.** HSQC spectrum of compound **7** (CDCl<sub>3</sub>, 400, 100 MHz).

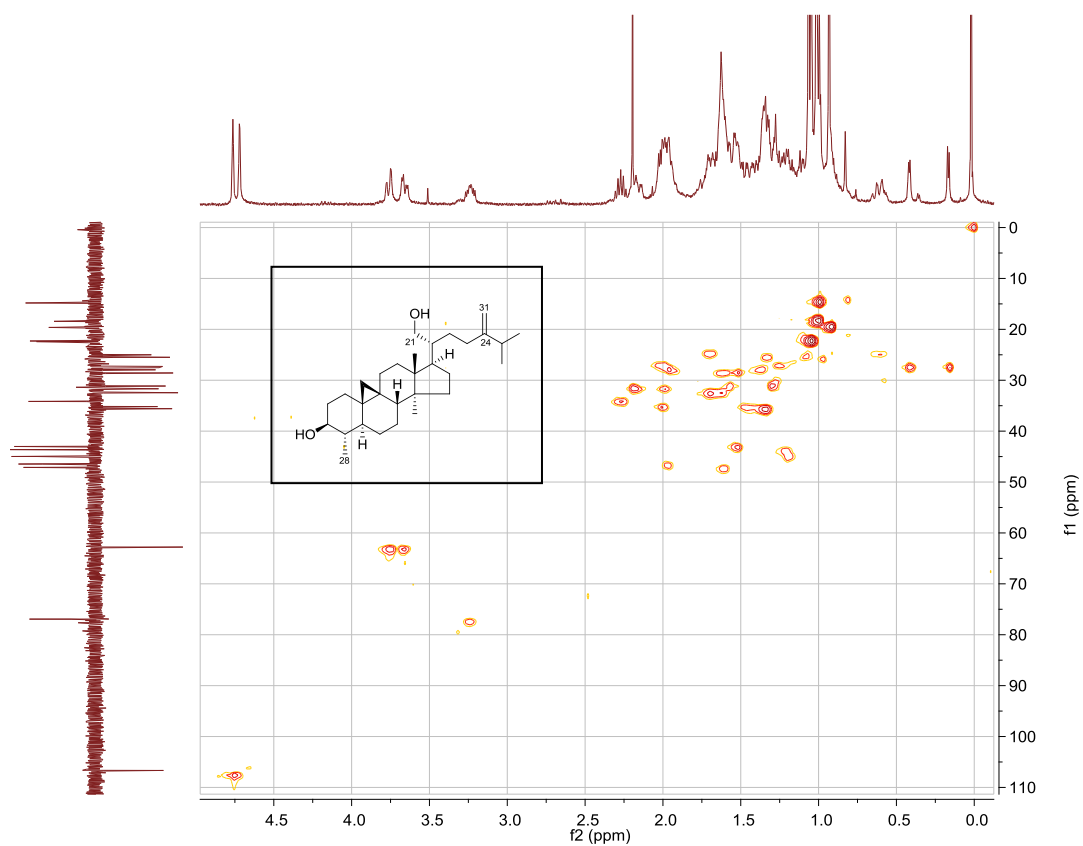

**Figure S7-5.** HMBC spectrum of compound **7** (CDCl<sub>3</sub>, 400, 100 MHz).

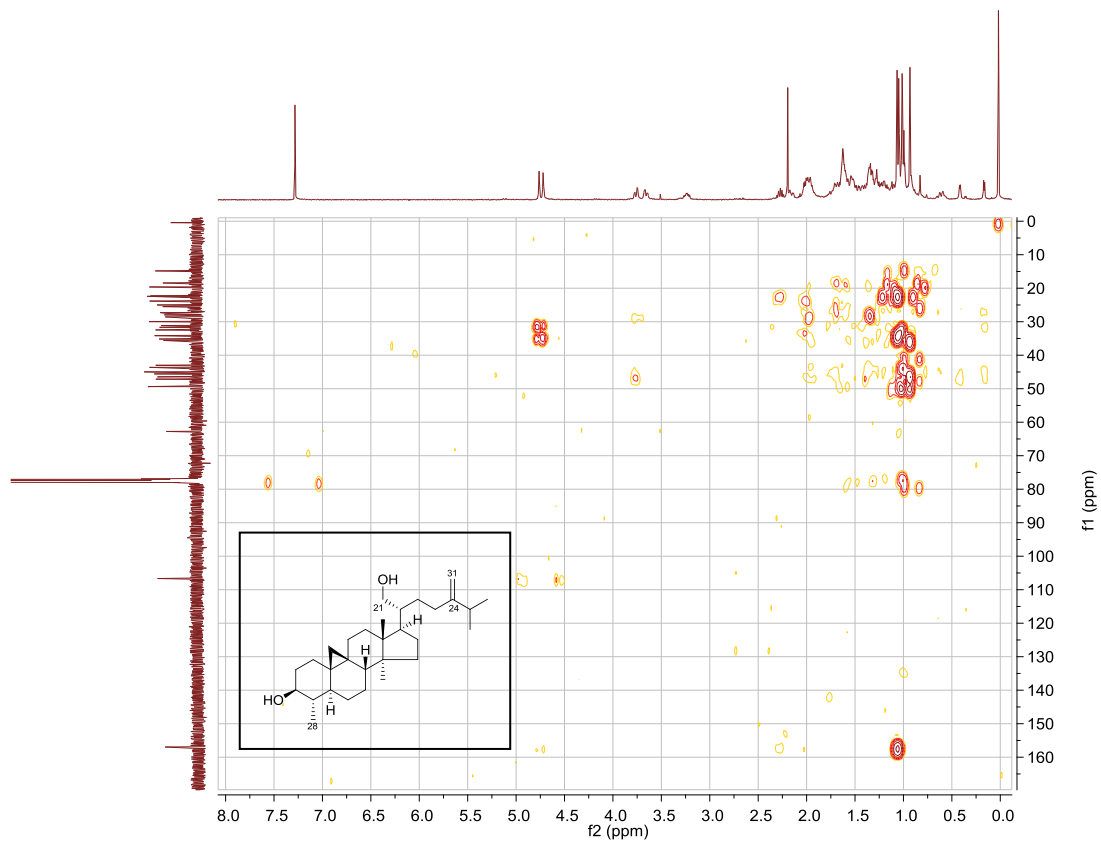

**Figure S7-6.**  $^1\text{H}$ - $^1\text{H}$  COSY spectrum of compound **7** ( $\text{CDCl}_3$ , 400 MHz).

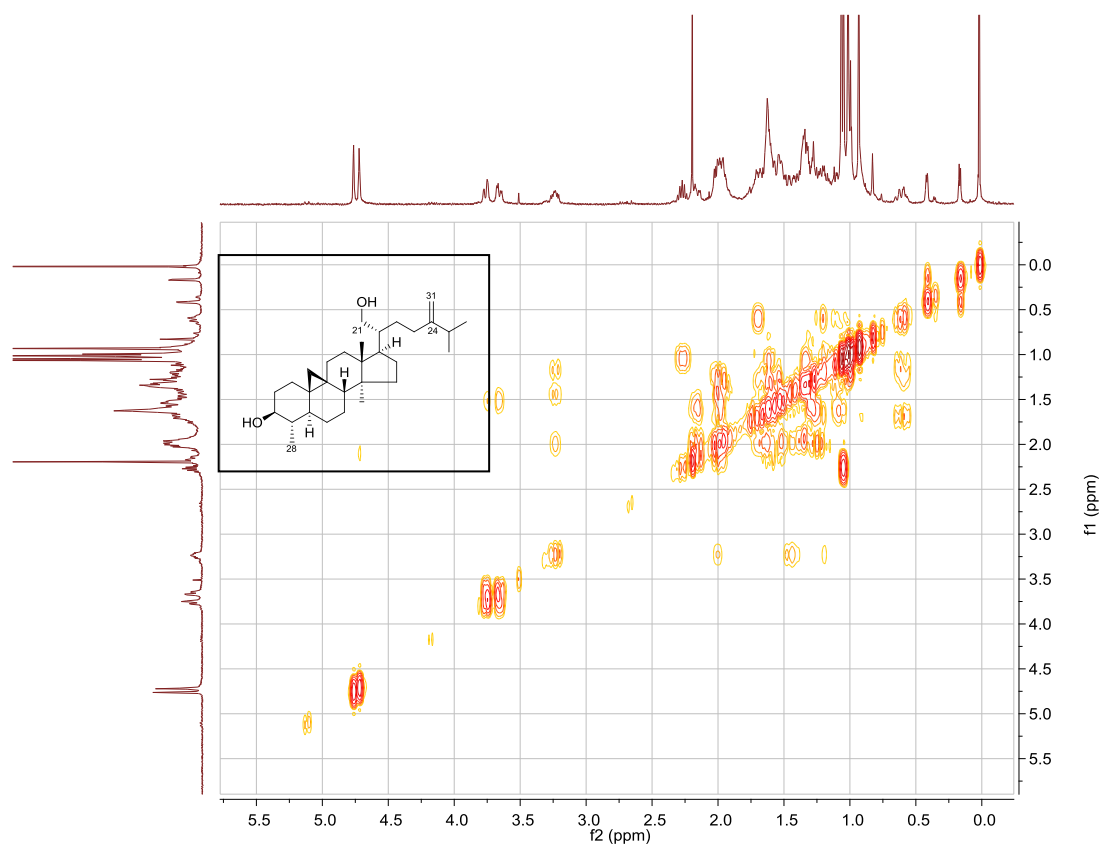

**Figure S7-7.** NOESY spectrum of compound **7** ( $\text{CDCl}_3$ , 400 MHz).

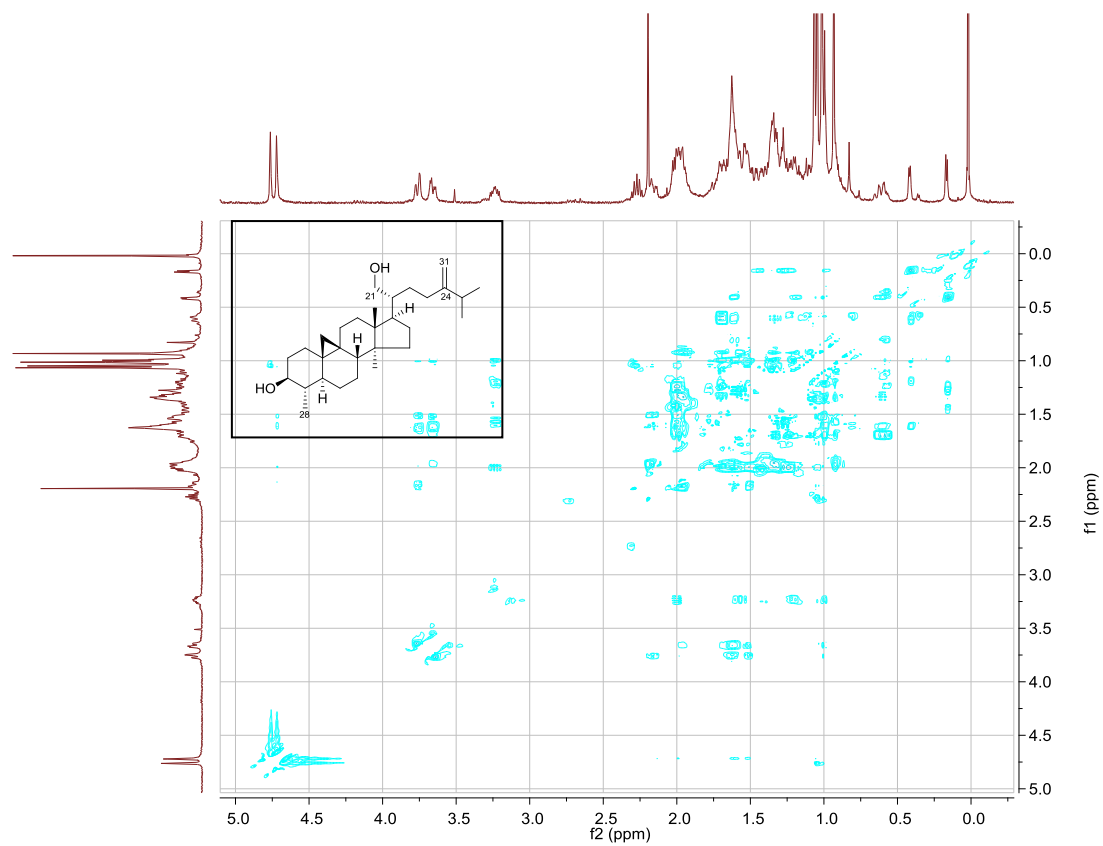

**Figure S7-8.**  $^1\text{H}$  NMR spectrum of (*R*)-MTPA ester of compound **8** (pyridine-*d*<sub>5</sub>, 400 MHz).

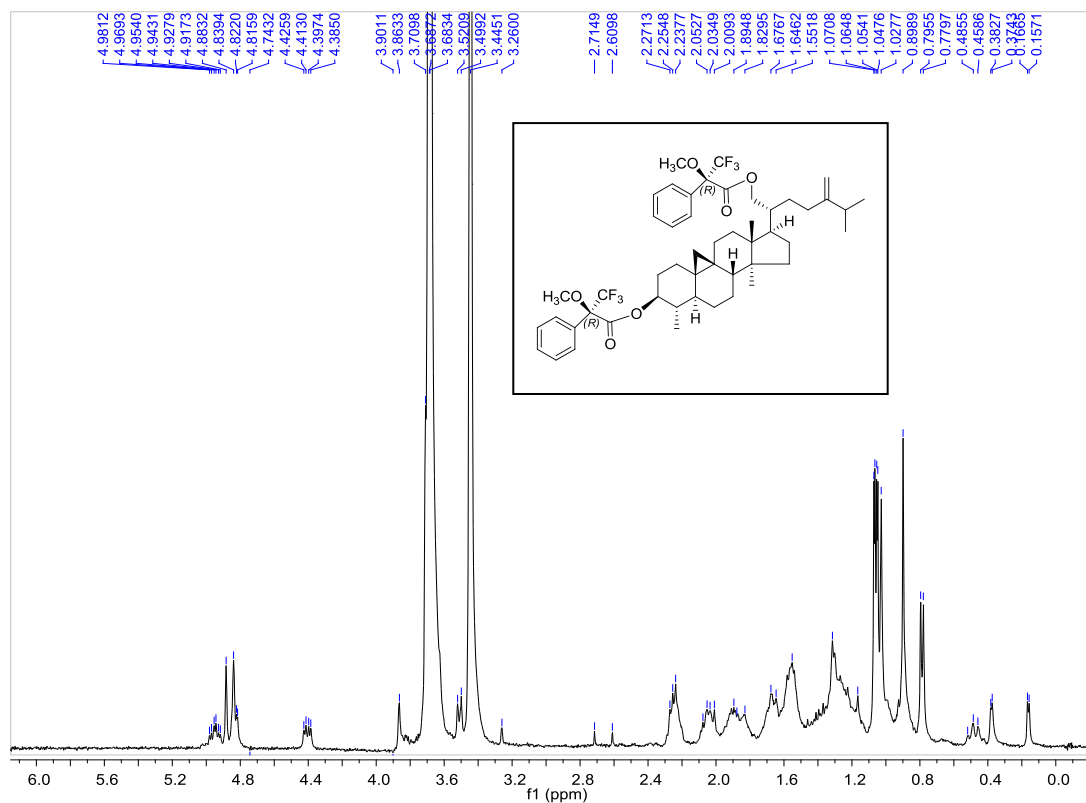

**Figure S7-9.**  $^1\text{H}$  NMR spectrum of (*S*)-MTPA ester of compound **7** (pyridine-*d*<sub>5</sub>, 400 MHz).

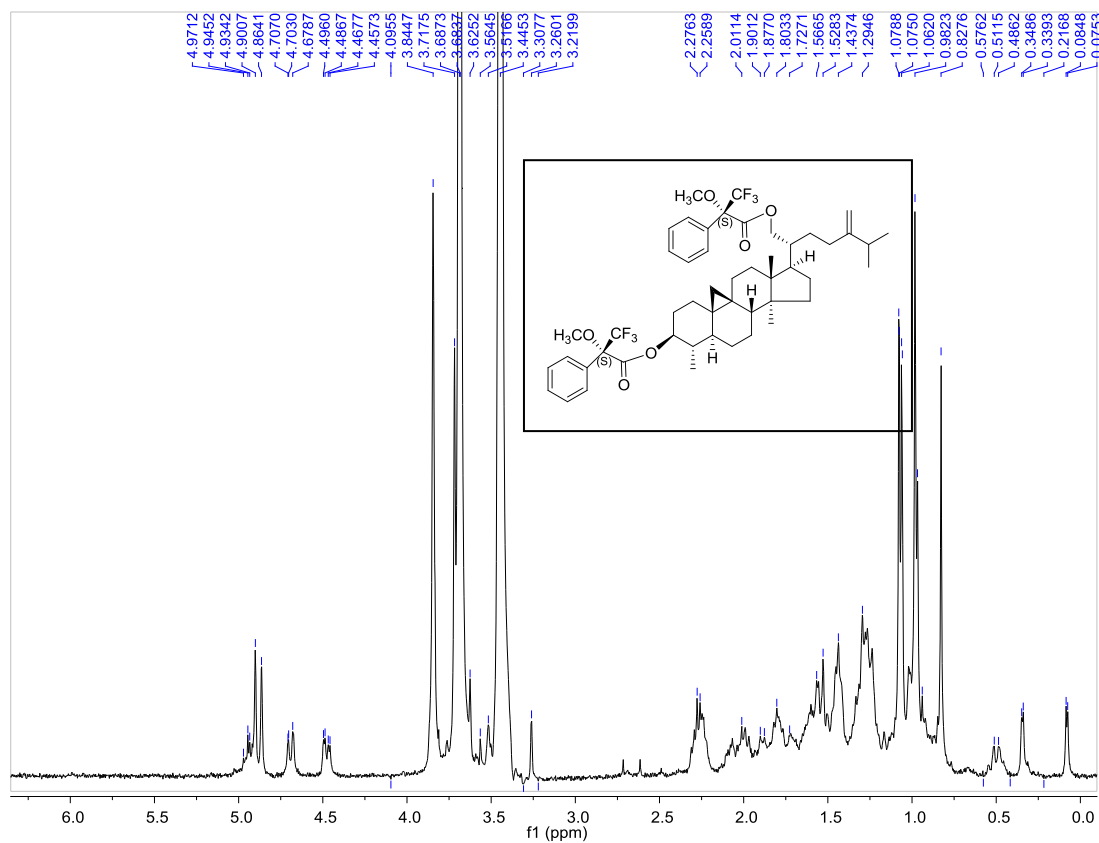

**Figure S8-1.**  $^1\text{H}$  NMR spectrum of compound **8** (methanol- $d_4$ , 400 MHz).

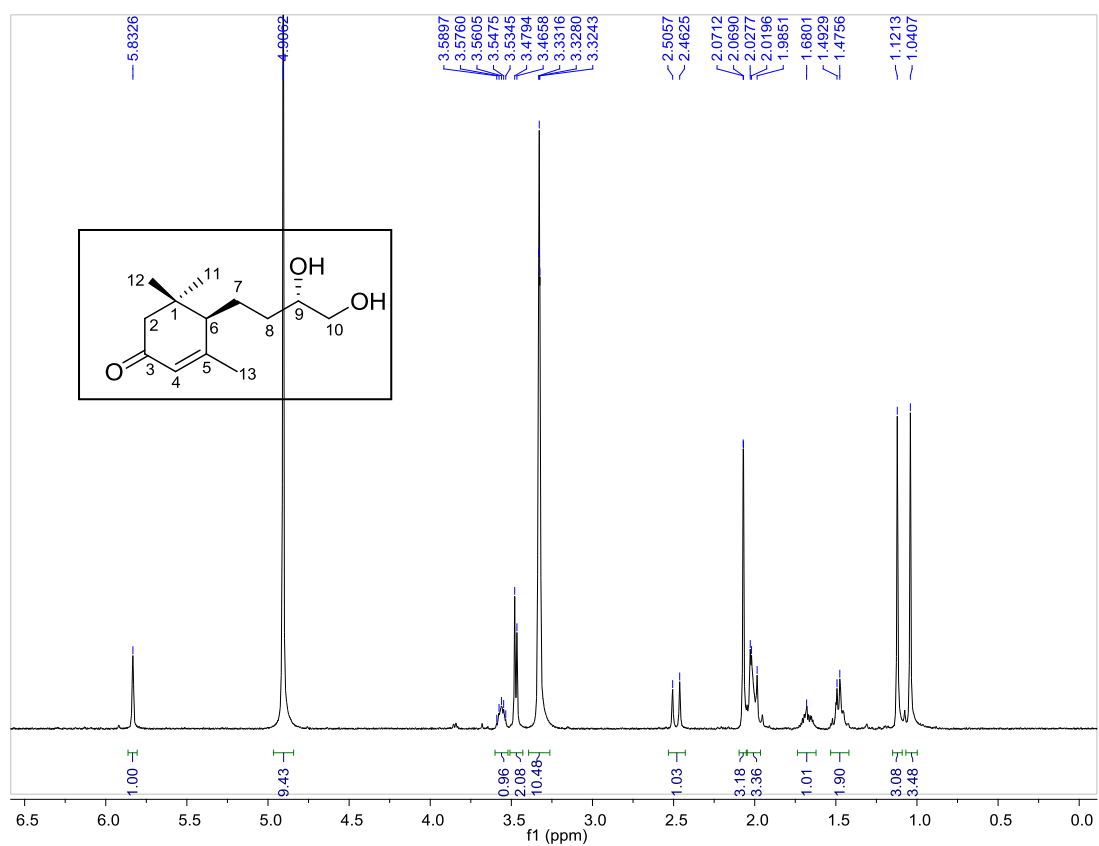

**Figure S8-2.**  $^{13}\text{C}$  DEPT135 spectrum of compound **8** (methanol- $d_4$ , 100 MHz).

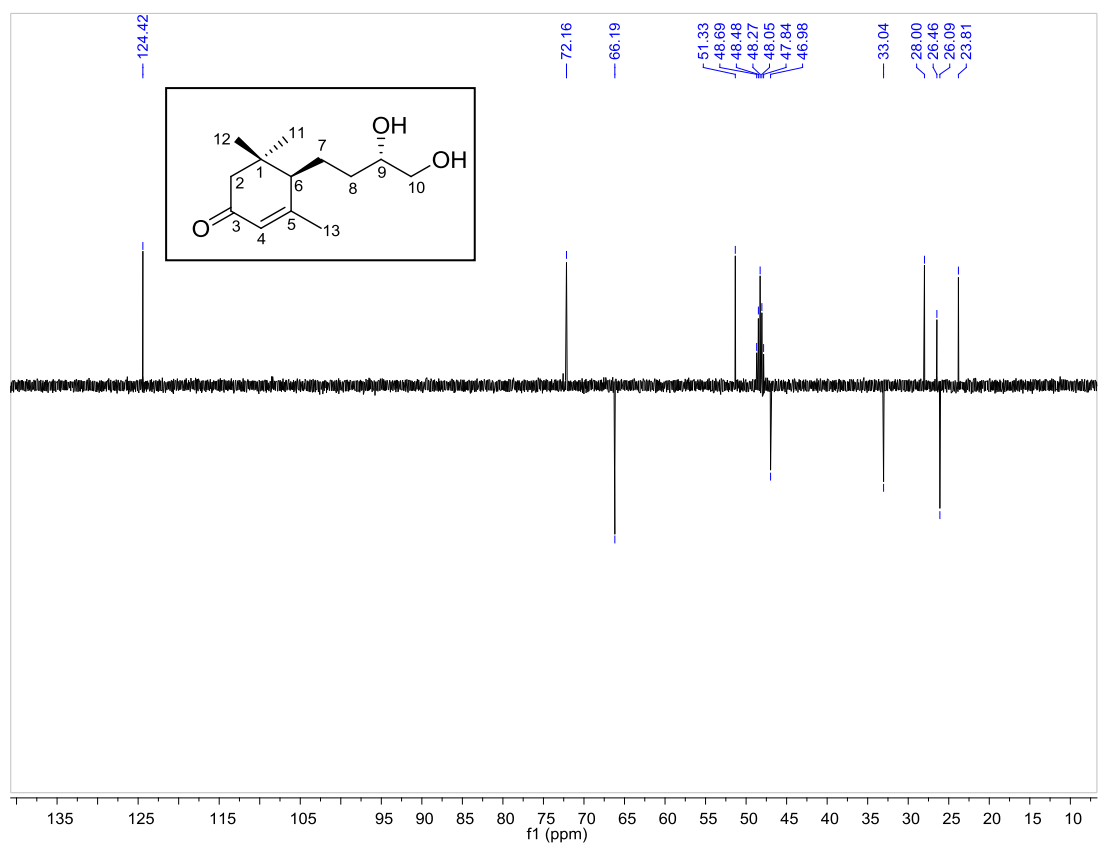

**Figure S8-3.**  $^{13}\text{C}$  NMR spectrum of compound **8** (methanol- $d_4$ , 100 MHz).

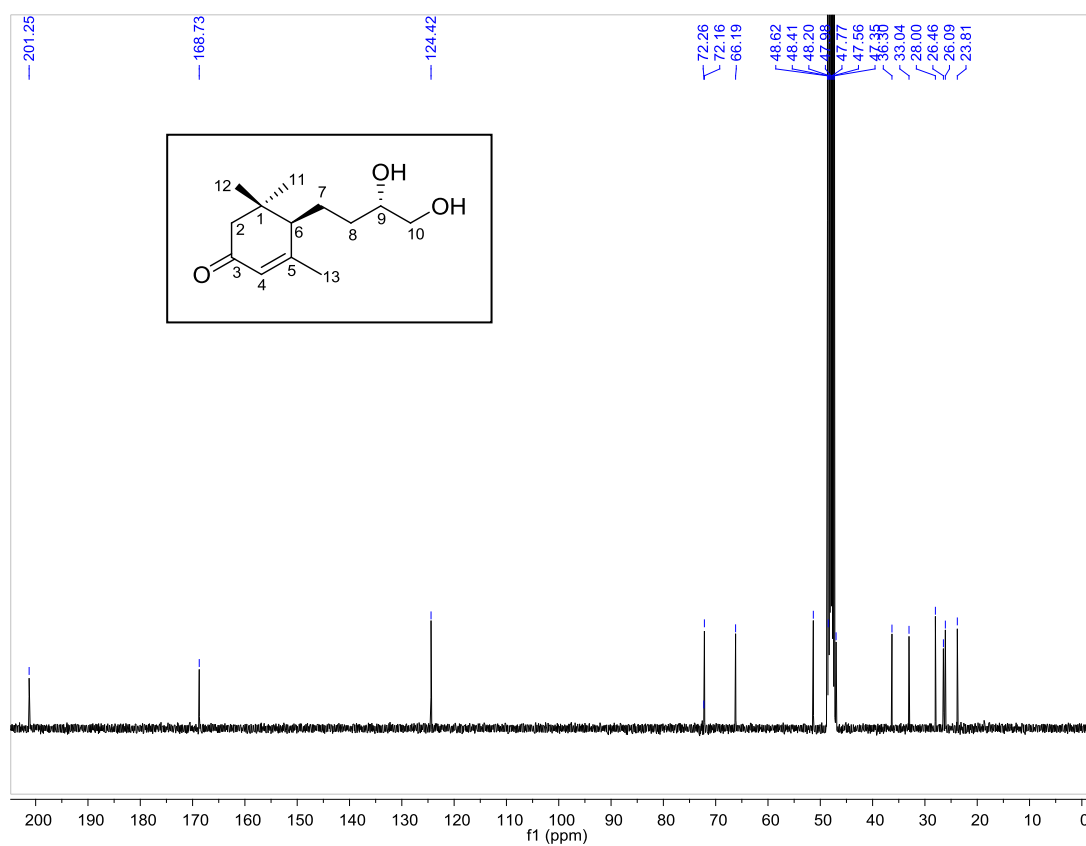

**Figure S8-4.** HSQC spectrum of compound **8** (methanol- $d_4$ , 400, 100 MHz).

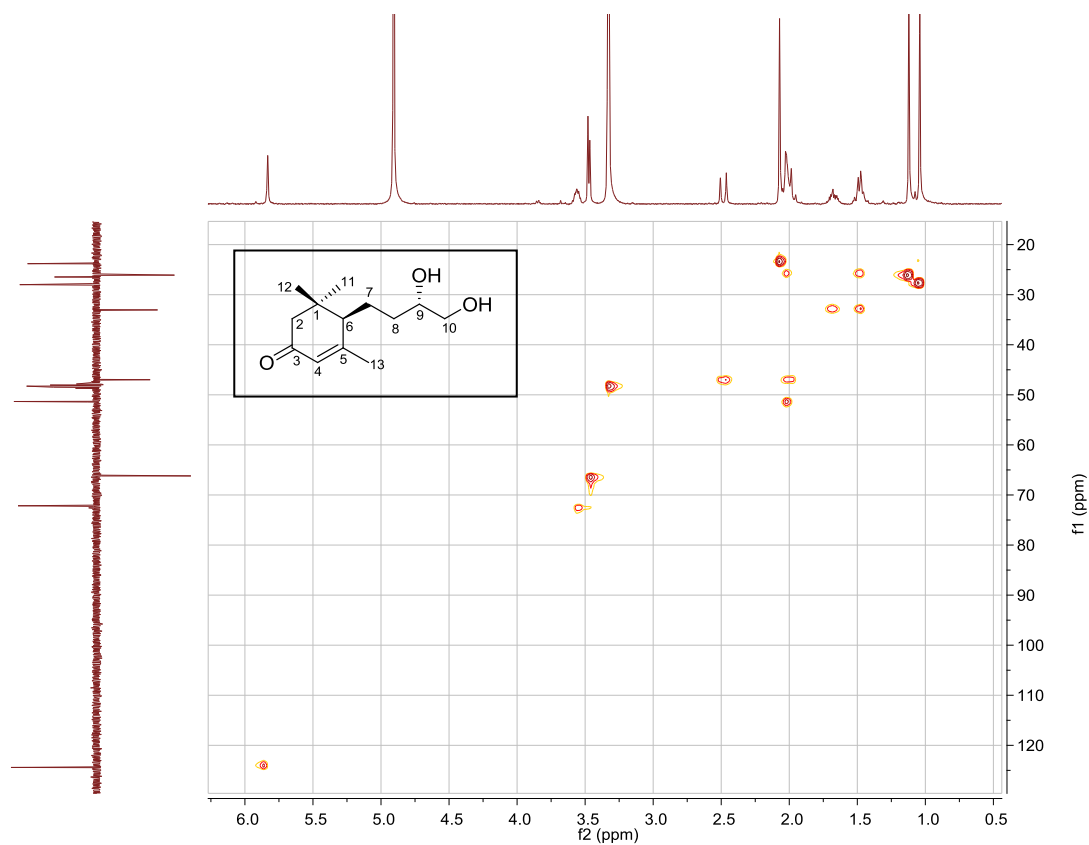



**Figure S8-5.** HMBC spectrum of compound **8** (methanol- $d_4$ , 400, 100 MHz).

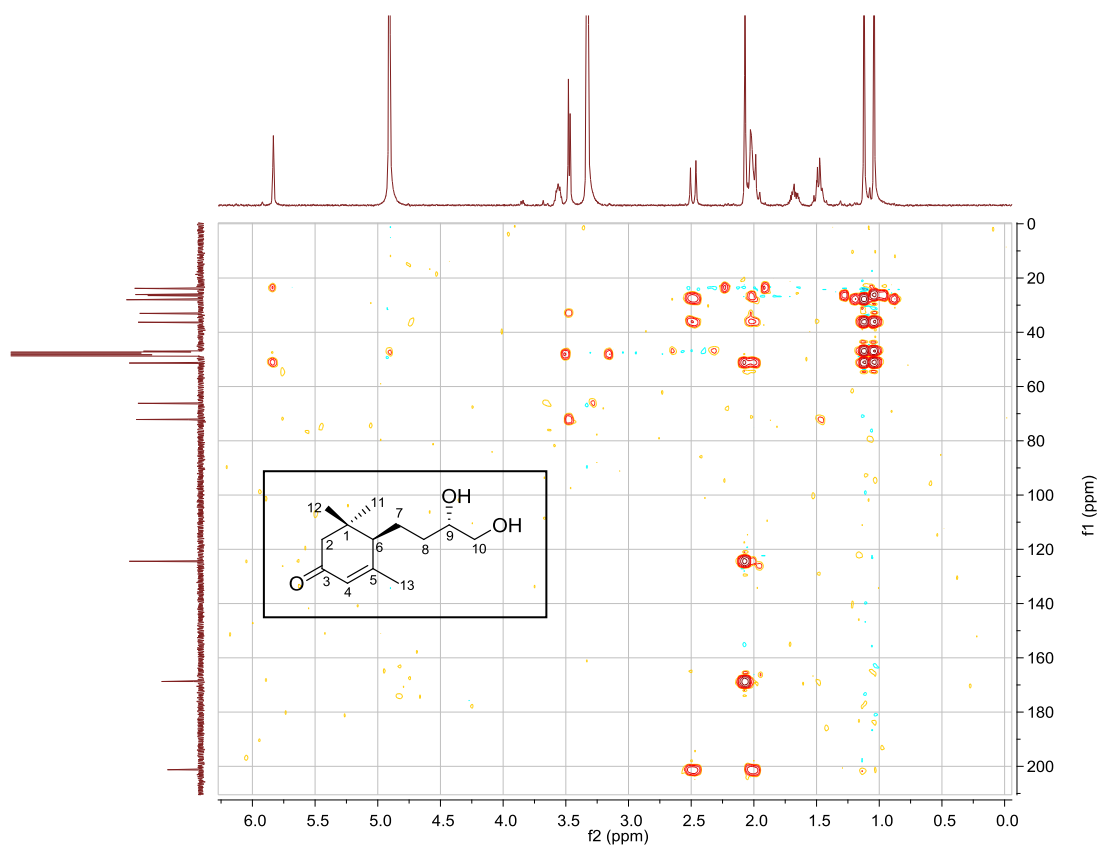

**Figure S8-6.**  $^1\text{H}$ - $^1\text{H}$  COSY spectrum of compound **8** (methanol- $d_4$ , 400 MHz).

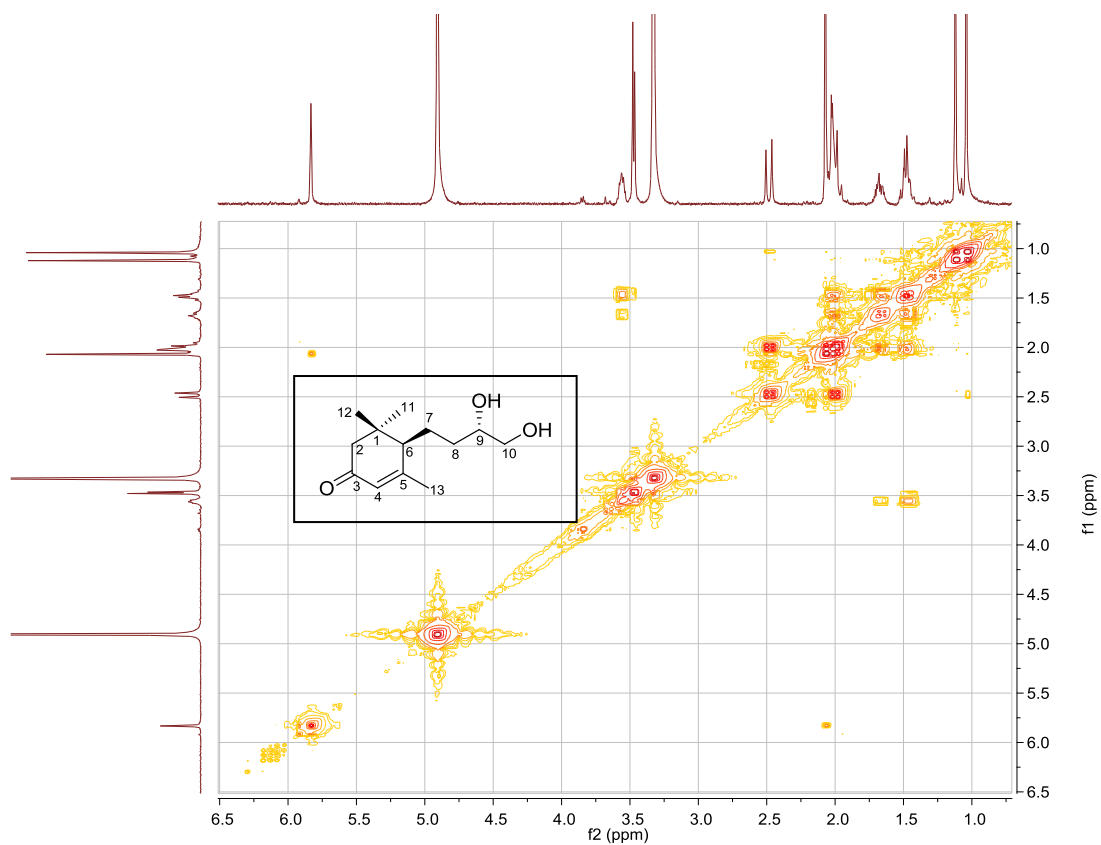

**Figure S8-7.** NOESY spectrum of compound **8** (methanol- $d_4$ , 400 MHz).

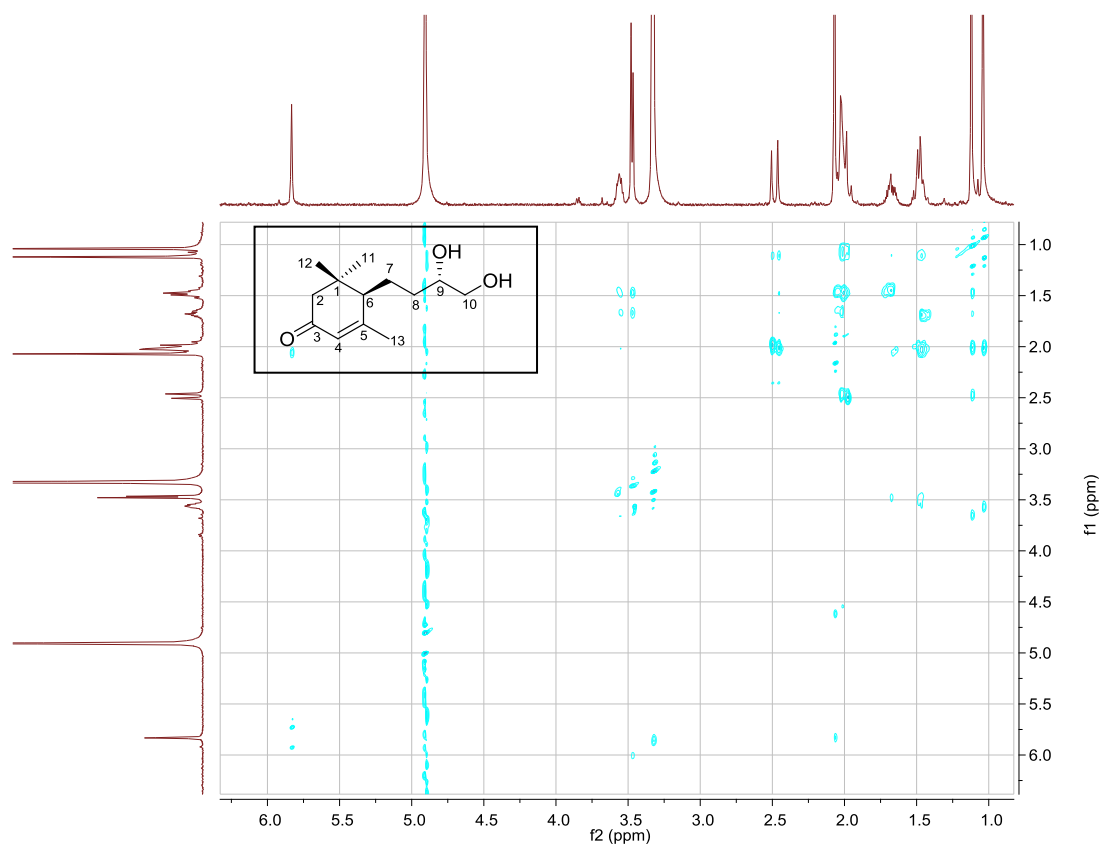

Supplement: NIHMS434705-supplement-1_si_001.pdf [file NIHMS434705-supplement-1_si_001.pdf]
